# Supplementary material for: A Generic LC-HRMS Screening Method for Marine and Freshwater Phycotoxins in Fish, Shellfish, Water, and Supplements
Source: MDPI journal article supplement (doi:10.3390/toxins13110823), 2021-11-22
Supplement: s1 [file s1]

# Supplementary Materials: A generic LC-HRMS screening method for marine and freshwater phycotoxins in fish, shellfish, water and supplements

Mirjam D. Klijnsma, Elisabeth J. Faassen and Arjen Gerssen

## S1: Structures

### *β-N-methylamino-L-alanine*

Abbreviation: BMAA  
Cas number: 15920-93-1  
Molecular formula: C<sub>4</sub>H<sub>10</sub>N<sub>2</sub>O<sub>2</sub>  
Exact mass: 118.074228  
Group: Hydrophilic

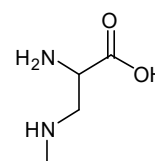

### *D-2,4-Diaminobutyric acid*

Abbreviation: DAB  
Cas number: 26908-94-1  
Molecular formula: C<sub>4</sub>H<sub>10</sub>N<sub>2</sub>O<sub>2</sub>  
Exact mass: 118.074228  
Group: Hydrophilic

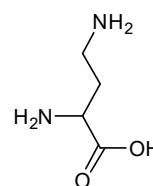

### *Anatoxin-a*

Abbreviation: ATX  
Cas number: 64285-06-9  
Molecular formula: C<sub>10</sub>H<sub>15</sub>NO  
Exact mass: 165.115364  
Group: Hydrophilic

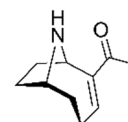

### *Domoic acid*

Abbreviation: DA  
Cas number: 14277-97-5  
Molecular formula: C<sub>15</sub>H<sub>21</sub>NO<sub>6</sub>  
Exact mass: 311.136889  
Group: ASP, Hydrophilic

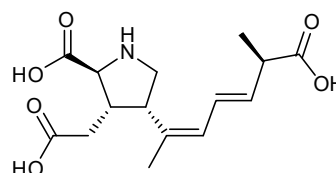

*Tetrodotoxin*

Abbreviation: TTX  
 Cas number: 4368-28-9  
 Molecular formula:  $C_{11}H_{17}N_3O_8$   
 Exact mass: 319.101567  
 Group: Hydrophilic

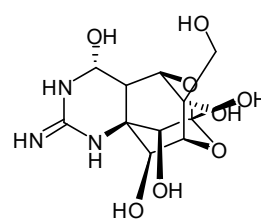*PSP toxins, hydrophilic*

Group: Hydrophilic

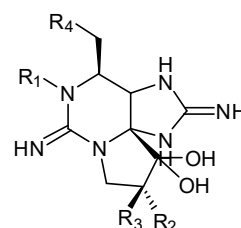

| Name                           | Abbr.  | Cas number | Molecular formula          | Exact mass | R1 | R2        | R3        | R4 |
|--------------------------------|--------|------------|----------------------------|------------|----|-----------|-----------|----|
| Saxitoxin                      | STX    | 35523-89-8 | $C_{10}H_{17}N_7O_4$       | 299.134203 | H  | H         | H         |    |
| Neosaxitoxin                   | NEO    | 64296-20-4 | $C_{10}H_{17}N_7O_5$       | 315.129118 | OH | H         | H         |    |
| Gonyautoxin 1                  | GTX1   | 60748-39-2 | $C_{10}H_{17}N_7O_5S$      | 411.080850 | OH | H         | $OSO_3^-$ |    |
| Gonyautoxin 2                  | GTX2   | 60508-89-6 | $C_{10}H_{17}N_7O_8S$      | 395.085935 | H  | H         | $OSO_3^-$ |    |
| Gonyautoxin 3                  | GTX3   | 60537-65-7 | $C_{10}H_{17}N_7O_8S$      | 395.085935 | H  | $OSO_3^-$ | H         |    |
| Gonyautoxin 4                  | GTX4   | 64296-26-0 | $C_{10}H_{17}N_7O_9S$      | 411.080850 | OH | $OSO_3^-$ | H         |    |
| Gonyautoxin 5                  | GTX5   | 64296-25-9 | $C_{10}H_{17}N_7O_7S$      | 379.091020 | H  | H         | H         |    |
| N-sulfocarbamoyl gonyautoxin 2 | C1     | 80173-30-4 | $C_{10}H_{17}N_7O_{11}S_2$ | 475.042752 | H  | H         | $OSO_3^-$ |    |
| N-sulfocarbamoyl gonyautoxin 3 | C2     | 80226-62-6 | $C_{10}H_{17}N_7O_{11}S_2$ | 475.042752 | H  | $OSO_3^-$ | H         |    |
| Decarbamoylsaxitoxin           | dcSTX  | 58911-04-9 | $C_9H_{16}N_6O_3$          | 256.128389 | H  | H         | H         | OH |
| Decarbamoylneosaxitoxin        | dcNEO  | 68683-58-9 | $C_9H_{16}N_6O_4$          | 272.123304 | OH | H         | H         | OH |
| Decarbamoylgonyautoxin 2       | dcGTX2 | 86996-87-4 | $C_9H_{16}N_6O_7S$         | 352.080121 | H  | H         | $OSO_3^-$ | OH |
| Decarbamoylgonyautoxin 3       | dcGTX3 | 87038-53-7 | $C_9H_{16}N_6O_7S$         | 352.080121 | H  | $OSO_3^-$ | H         | OH |

*Cylindrospermopsin*

Abbreviation: CYN  
 Cas number: 143545-90-8  
 Molecular formula:  $C_{15}H_{21}N_5O_7S$   
 Exact mass: 415.116172  
 Group: Hydrophilic

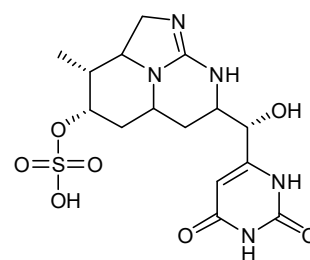

*Gymnodimine A*

Abbreviation: GYM A  
 Cas number: 173792-58-0  
 Molecular formula:  $C_{32}H_{45}NO_4$   
 Exact mass: 507.334859  
 Group: Cyclic imines, Lipophilic

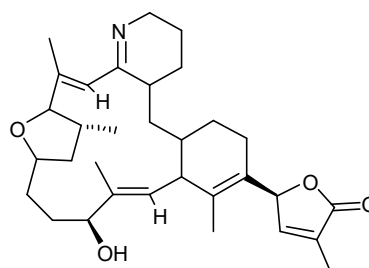*Spirolide C*

Group: Cyclic imines, Lipophilic

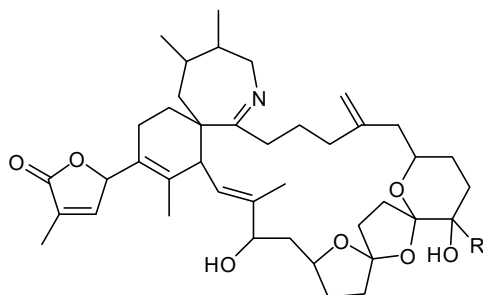

| Name                          | Abbr.             | Cas number  | Molecular formula  | Exact mass | R1              |
|-------------------------------|-------------------|-------------|--------------------|------------|-----------------|
| 13-Desmethyl spirolide C      | SPX1              | 334974-07-1 | $C_{42}H_{61}NO_7$ | 691.444804 | CH <sub>3</sub> |
| 13,19-Didesmethyl spirolide C | 13,19-didesMeSPXC | 908118-02-5 | $C_{41}H_{59}NO_7$ | 677.429154 | H               |

*20-Methyl spirolide G*

Abbreviation: 20MeSPXG  
 Cas number: 849215-95-8  
 Molecular formula:  $C_{43}H_{63}NO_7$   
 Exact mass: 705.460454  
 Group: Cyclic imines, Lipophilic

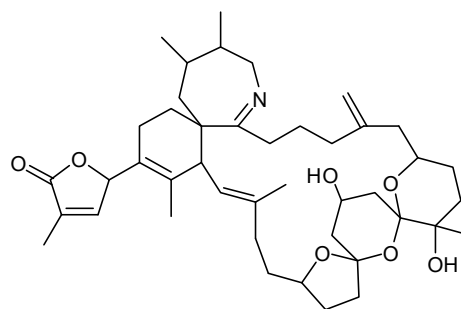*Pinnatoxins*

Group: Cyclic imines, Lipophilic

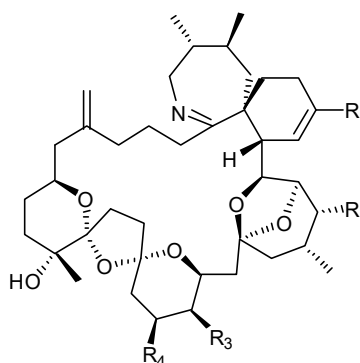

| Name         | Abbr.  | Cas number   | Molecular formula                                | Exact mass | R1 | R2 | R3 | R4              |
|--------------|--------|--------------|--------------------------------------------------|------------|----|----|----|-----------------|
| Pinnatoxin E | PnTX E | 1227167-69-2 | C <sub>45</sub> H <sub>69</sub> NO <sub>10</sub> | 783.492149 |    | H  | OH | CH <sub>3</sub> |
| Pinnatoxin F | PnTX F | 1227167-70-5 | C <sub>45</sub> H <sub>67</sub> NO <sub>9</sub>  | 765.481584 |    | H  | OH | CH <sub>3</sub> |
| Pinnatoxin G | PnTX G | 1312711-74-2 | C <sub>42</sub> H <sub>63</sub> NO <sub>7</sub>  | 693.460454 |    | OH | H  | H               |

### Azaspiracids

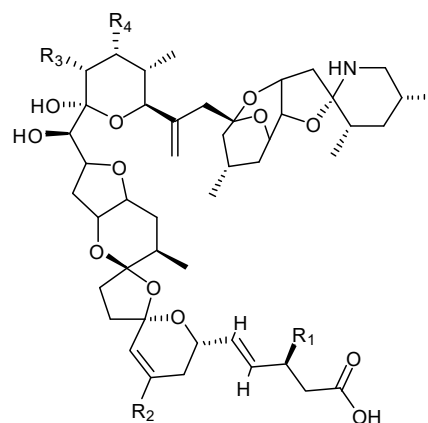

Group: Lipophilic

| Name          | Abbr. | Cas number  | Molecular formula                                | Exact mass | R1 | R2              | R3              | R4 |
|---------------|-------|-------------|--------------------------------------------------|------------|----|-----------------|-----------------|----|
| Azaspiracid 1 | AZA1  | 214899-21-5 | C <sub>47</sub> H <sub>71</sub> NO <sub>12</sub> | 841.497629 | H  | H               | CH <sub>3</sub> | H  |
| Azaspiracid 2 | AZA2  | 265996-92-7 | C <sub>48</sub> H <sub>73</sub> NO <sub>12</sub> | 855.513279 | H  | CH <sub>3</sub> | CH <sub>3</sub> | H  |
| Azaspiracid 3 | AZA3  | 265996-93-8 | C <sub>46</sub> H <sub>69</sub> NO <sub>12</sub> | 827.481979 | H  | H               | H               | H  |
| Azaspiracid 4 | AZA4  | 344422-49-7 | C <sub>46</sub> H <sub>69</sub> NO <sub>13</sub> | 843.476894 | OH | H               | H               | H  |
| Azaspiracid 5 | AZA5  | 344422-51-1 | C <sub>46</sub> H <sub>69</sub> NO <sub>13</sub> | 843.476894 | H  | H               | H               | OH |

### Pectenotoxin 2

Abbreviation: PTX2

Cas number: 97564-91-5

Molecular formula: C<sub>47</sub>H<sub>70</sub>O<sub>14</sub>

Exact mass: 858.476560

Group: Lipophilic

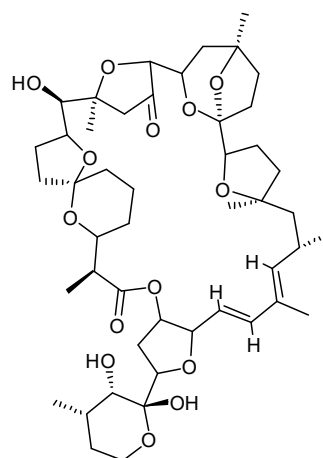

*Nodularin*

– D-MeAsp – L-Arg – Adda – D-Glu – Mdhb –

Abbreviation: NOD

Cas number: 118399-22-7

Molecular formula: C<sub>41</sub>H<sub>60</sub>N<sub>8</sub>O<sub>10</sub>

Exact mass: 824.443242

Group: Lipophilic

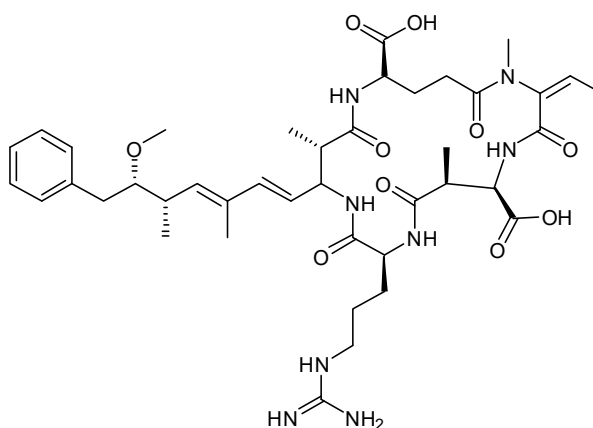*Microcystins*

– D-Ala – X –D- MeAsp – Y – Adda – D-Glu – Mdha –

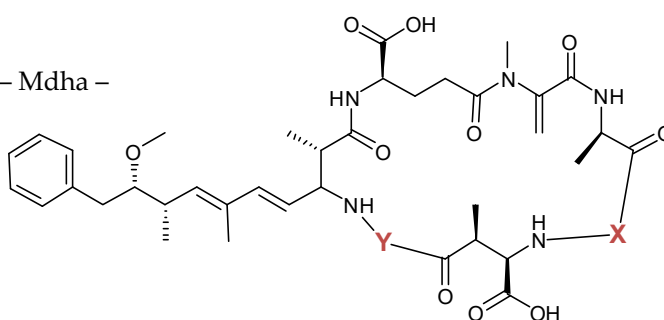

Group: Lipophilic

| Name                            | Abbr.    | Cas number  | Molecular formula                                               | Exact mass  | X   | Y   |
|---------------------------------|----------|-------------|-----------------------------------------------------------------|-------------|-----|-----|
| Microcystin HilR                | MC-HilR  | 169789-55-3 | C <sub>50</sub> H <sub>76</sub> N <sub>10</sub> O <sub>12</sub> | 1008.56442  | Hil | Arg |
| Microcystin HtyR                | MC-HtyR  | 478001-08-0 | C <sub>53</sub> H <sub>74</sub> N <sub>10</sub> O <sub>13</sub> | 1058.543685 | Hty | Arg |
| Microcystin LA                  | MC-LA    | 96180-79-9  | C <sub>46</sub> H <sub>67</sub> N <sub>7</sub> O <sub>12</sub>  | 909.484773  | Leu | Ala |
| Microcystin LF                  | MC-LF    | 154037-70-4 | C <sub>52</sub> H <sub>71</sub> N <sub>7</sub> O <sub>12</sub>  | 985.516073  | Leu | Phe |
| Microcystin LR                  | MC-LR    | 101043-37-2 | C <sub>49</sub> H <sub>74</sub> N <sub>10</sub> O <sub>12</sub> | 994.548770  | Leu | Arg |
| Microcystin LW                  | MC-LW    | 157622-02-1 | C <sub>54</sub> H <sub>72</sub> N <sub>8</sub> O <sub>12</sub>  | 1024.526972 | Leu | Trp |
| Microcystin LY                  | MC-LY    | 123304-10-9 | C <sub>52</sub> H <sub>71</sub> N <sub>7</sub> O <sub>13</sub>  | 1001.510988 | Leu | Tyr |
| Microcystin RR                  | MC-RR    | 111755-37-4 | C <sub>49</sub> H <sub>75</sub> N <sub>13</sub> O <sub>12</sub> | 1037.565817 | Arg | Arg |
| Microcystin WR                  | MC-WR    | 138234-58-9 | C <sub>54</sub> H <sub>73</sub> N <sub>11</sub> O <sub>12</sub> | 1067.544019 | Trp | Arg |
| Microcystin YR                  | MC-YR    | 101064-48-6 | C <sub>52</sub> H <sub>72</sub> N <sub>10</sub> O <sub>13</sub> | 1044.528035 | Tyr | Arg |
| Asp <sup>3</sup> microcystin LR | AspMC-LR | 120011-66-7 | C <sub>48</sub> H <sub>72</sub> N <sub>10</sub> O <sub>12</sub> | 980.533120  | Leu | Arg |

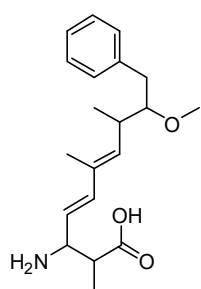

Adda

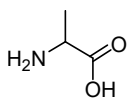

Ala

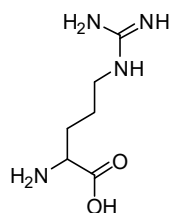

Arg

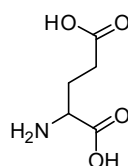

Glu

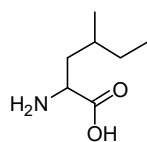

Hil

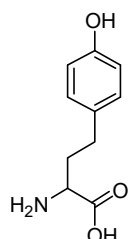

Hty

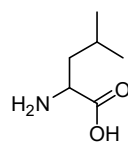

Leu

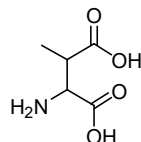

MeAsp

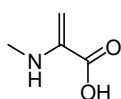

Mdha

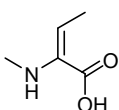

Mdhb

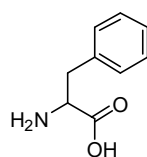

Phe

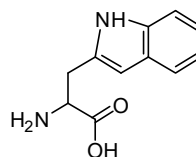

Trp

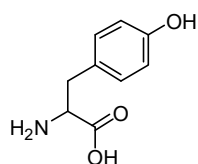

Tyr

## DSP

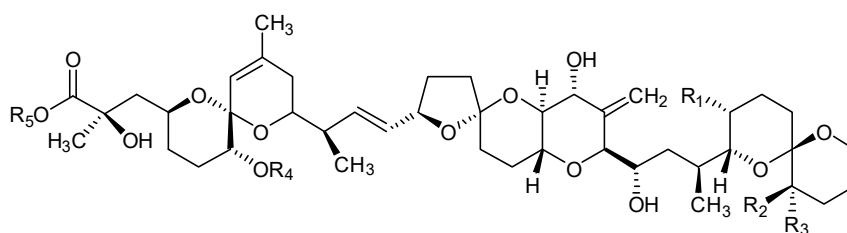

Group:

Lipophilic

| Name                       | Abbr.            | Cas number  | Molecular formula                               | Exact mass  | R1              | R2              | R3              | R4                                               | R5              |
|----------------------------|------------------|-------------|-------------------------------------------------|-------------|-----------------|-----------------|-----------------|--------------------------------------------------|-----------------|
| Okadaic acid               | OA               | 78111-17-8  | C <sub>44</sub> H <sub>68</sub> O <sub>13</sub> | 804.465995  | CH <sub>3</sub> | H               | H               | H                                                | H               |
| Dinophysistoxin 1          | DTX1             | 81720-10-7  | C <sub>45</sub> H <sub>70</sub> O <sub>13</sub> | 818.481645  | CH <sub>3</sub> | CH <sub>3</sub> | H               | H                                                | H               |
| Dinophysistoxin 2          | DTX2             | 139933-46-3 | C <sub>44</sub> H <sub>68</sub> O <sub>13</sub> | 804.465995  | H               | H               | CH <sub>3</sub> | H                                                | H               |
| 16:0 7-O-Acyl okadaic acid | DTX3             | 118745-19-0 | C <sub>60</sub> H <sub>98</sub> O <sub>14</sub> | 1042.695660 | CH <sub>3</sub> | H               | H               | (CH <sub>2</sub> ) <sub>14</sub> CH <sub>3</sub> | H               |
| Okadaic acid methyl ester  | OA methyl ester  | 78111-14-5  | C <sub>45</sub> H <sub>70</sub> O <sub>13</sub> | 818.481645  | CH <sub>3</sub> | H               | H               | H                                                | CH <sub>3</sub> |
| Okadaic acid-D8a           | OA C8-diol ester | 318536-96-8 | C <sub>52</sub> H <sub>80</sub> O <sub>14</sub> | 928.554810  | CH <sub>3</sub> | H               | H               | H                                                |                 |

## Brevetoxins

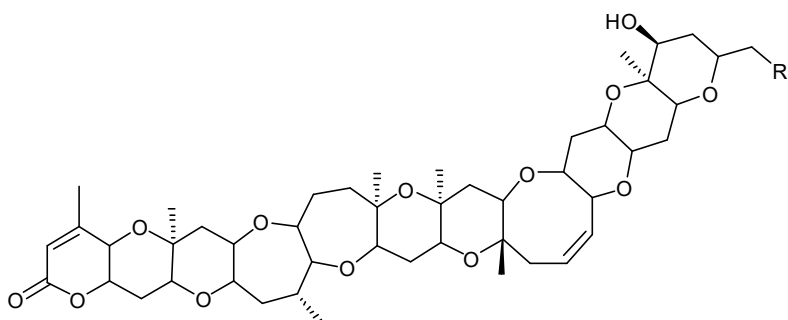

Group:

Lipophilic

| Name         | Abbr.  | Cas number  | Molecular formula                               | Exact mass | R1 |
|--------------|--------|-------------|-------------------------------------------------|------------|----|
| Brevetoxin 2 | PbTx 2 | 79580-28-2  | C <sub>50</sub> H <sub>70</sub> O <sub>14</sub> | 894.476560 |    |
| Brevetoxin 3 | PbTx 3 | 85079-48-7  | C <sub>50</sub> H <sub>72</sub> O <sub>14</sub> | 896.492210 |    |
| Brevetoxin 9 | PbTx 9 | 142353-09-1 | C <sub>50</sub> H <sub>74</sub> O <sub>14</sub> | 898.507860 |    |

## Yessotoxins

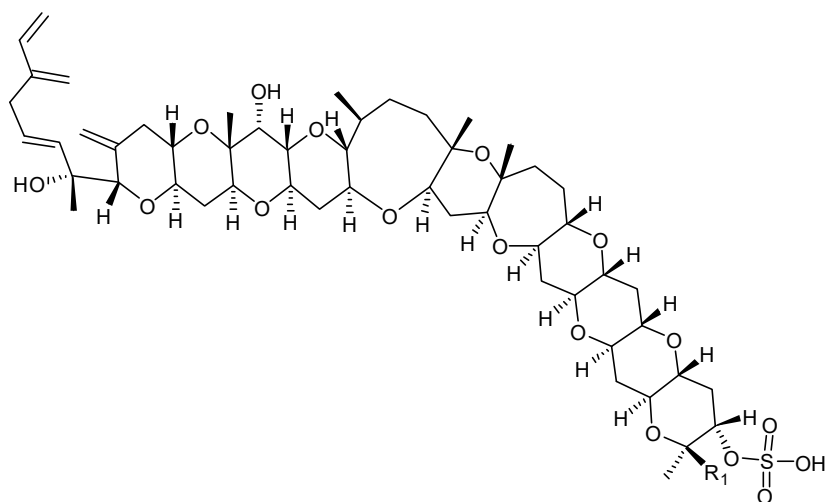

Group: Lipophilic

| Name              | Abbr. | Cas number  | Molecular formula                                              | Exact mass  | R1                                                            |
|-------------------|-------|-------------|----------------------------------------------------------------|-------------|---------------------------------------------------------------|
| Yessotoxin        | YTX   | 112514-54-2 | C <sub>55</sub> H <sub>82</sub> O <sub>21</sub> S <sub>2</sub> | 1142.479009 | (CH <sub>2</sub> ) <sub>2</sub> OSO <sub>3</sub> <sup>-</sup> |
| 1a-Homoyessotoxin | hYTX  | 196309-94-1 | C <sub>56</sub> H <sub>84</sub> O <sub>21</sub> S <sub>2</sub> | 1156.494659 | (CH <sub>2</sub> ) <sub>3</sub> OSO <sub>3</sub> <sup>-</sup> |

## Pacific ciguatoxins

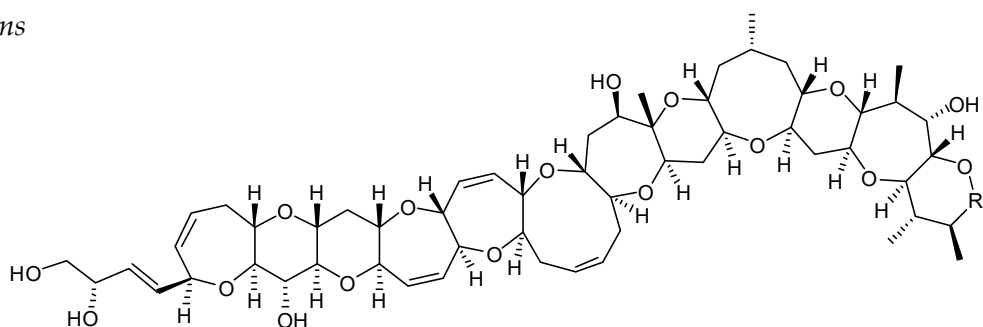

Group: Lipophilic

| Name                 | Abbr.   | Cas number  | Molecular formula                               | Exact mass  | R1 |
|----------------------|---------|-------------|-------------------------------------------------|-------------|----|
| Pacific ciguatoxin 1 | P-CTX-1 | 11050-21-8  | C <sub>60</sub> H <sub>86</sub> O <sub>19</sub> | 1110.576335 |    |
| Pacific ciguatoxin 2 | P-CTX-2 | 142185-85-1 | C <sub>60</sub> H <sub>86</sub> O <sub>18</sub> | 1094.581420 |    |
| Pacific ciguatoxin 3 | P-CTX-3 | 139341-09-6 | C <sub>60</sub> H <sub>86</sub> O <sub>18</sub> | 1094.581420 |    |



*Palytoxin*

Abbreviation: PITX

Cas number: 77734-92-0

Molecular formula:  $C_{129}H_{223}N_3O_{54}$

Exact mass: 2678.479607

Group: Lipophilic

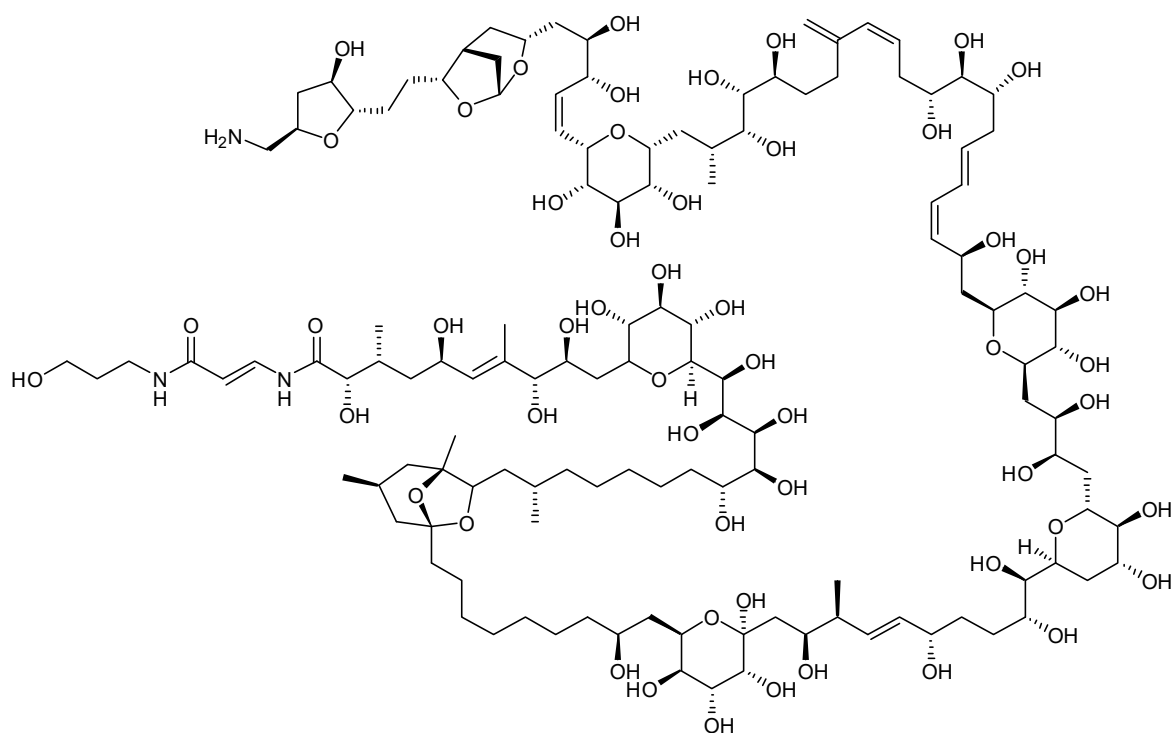

## S3: Validation data

## Screening of hydrophilic and lipophilic phycotoxins in shellfish and fish

Spiking levels: Hydrophilic phycotoxins 600 µg kg<sup>-1</sup>\*Microcystins and nodularin 150 µg kg<sup>-1</sup>Other lipophilic phycotoxins 80 µg kg<sup>-1</sup>\*Exceptions: dcGTX3 (134 µg kg<sup>-1</sup>), GTX1&4 (795 µg kg<sup>-1</sup>), GTX3 (228 µg kg<sup>-1</sup>), C2 (180 µg kg<sup>-1</sup>)

Table S3.1. Validation results of hydrophilic phycotoxins in shellfish and fish.

| HILIC POS | S | blanks |   |   |   |   |   | mussel |   |   |   | cockle |   |   |   | oyster |   |   |   | ensis |   |   |   | fish |   |   |   | S |
|-----------|---|--------|---|---|---|---|---|--------|---|---|---|--------|---|---|---|--------|---|---|---|-------|---|---|---|------|---|---|---|---|
| ATX       | 3 | 1      | 0 | 1 | 0 | 0 | 1 | 2      | 3 | 2 | 2 | 2      | 3 | 3 | 3 | 3      | 2 | 2 | 3 | 3     | 3 | 3 | 3 | 3    | 3 | 3 |   |   |
| dcNEO     | 3 | 0      | 0 | 0 | 0 | 0 | 0 | 3      | 2 | 1 | 3 | 3      | 3 | 3 | 2 | 3      | 3 | 3 | 3 | 2     | 2 | 3 | 3 | 3    | 3 | 3 |   |   |
| dcSTX     | 3 | 0      | 0 | 0 | 0 | 0 | 0 | 3      | 3 | 2 | 3 | 3      | 3 | 3 | 3 | 3      | 3 | 3 | 3 | 3     | 3 | 3 | 3 | 3    | 3 | 3 |   |   |
| NEO       | 3 | 0      | 0 | 0 | 0 | 0 | 0 | 3      | 3 | 1 | 3 | 3      | 3 | 3 | 2 | 3      | 3 | 3 | 3 | 3     | 2 | 3 | 3 | 3    | 3 | 3 |   |   |
| STX       | 3 | 0      | 0 | 0 | 0 | 0 | 0 | 3      | 3 | 2 | 3 | 3      | 3 | 3 | 3 | 3      | 3 | 3 | 3 | 3     | 3 | 3 | 3 | 3    | 3 | 3 |   |   |
| TTX       | 3 | 0      | 0 | 0 | 0 | 0 | 0 | 3      | 3 | 2 | 2 | 2      | 3 | 2 | 3 | 3      | 2 | 2 | 3 | 1     | 1 | 2 | 3 | 3    | 2 | 2 | 3 | 3 |
| HILIC NEG |   |        |   |   |   |   |   |        |   |   |   |        |   |   |   |        |   |   |   |       |   |   |   |      |   |   |   |   |
| CYN       | 2 | 0      | 0 | 0 | 0 | 0 | 0 | 2      | 2 | 2 | 2 | 2      | 2 | 1 | 2 | 2      | 2 | 2 | 2 | 1     | 2 | 2 | 1 | 2    | 2 | 2 | 2 |   |
| dcGTX2    | 3 | 0      | 1 | 0 | 0 | 0 | 0 | 3      | 3 | 3 | 3 | 3      | 3 | 3 | 3 | 3      | 3 | 3 | 3 | 3     | 3 | 3 | 3 | 3    | 3 | 3 |   |   |
| dcGTX3    | 3 | 1      | 0 | 0 | 0 | 0 | 0 | 3      | 3 | 2 | 2 | 2      | 3 | 3 | 3 | 3      | 3 | 3 | 3 | 2     | 3 | 3 | 3 | 3    | 3 | 3 |   |   |
| DA        | 2 | 0      | 1 | 1 | 0 | 0 | 0 | 2      | 2 | 2 | 2 | 2      | 2 | 2 | 2 | 2      | 2 | 2 | 2 | 2     | 2 | 2 | 2 | 2    | 2 | 2 |   |   |
| GTX1&4    | 3 | 0      | 0 | 0 | 0 | 0 | 1 | 2      | 3 | 3 | 3 | 3      | 3 | 3 | 3 | 2      | 3 | 2 | 2 | 3     | 2 | 2 | 3 | 3    | 3 | 3 |   |   |
| GTX2      | 3 | 0      | 0 | 0 | 0 | 0 | 0 | 3      | 3 | 3 | 3 | 3      | 3 | 3 | 3 | 3      | 3 | 3 | 3 | 3     | 3 | 3 | 2 | 3    | 3 | 3 |   |   |
| GTX3      | 3 | 0      | 0 | 0 | 0 | 0 | 0 | 3      | 3 | 3 | 3 | 3      | 3 | 3 | 3 | 3      | 3 | 3 | 3 | 2     | 2 | 3 | 3 | 3    | 3 | 3 |   |   |
| GTX5      | 3 | 0      | 0 | 0 | 0 | 1 | 0 | 3      | 3 | 3 | 3 | 3      | 3 | 3 | 3 | 3      | 2 | 2 | 2 | 2     | 2 | 2 | 3 | 3    | 3 | 3 |   |   |
| C1        | 3 | 0      | 0 | 0 | 0 | 0 | 0 | 1      | 1 | 3 | 2 | 2      | 2 | 2 | 2 | 2      | 2 | 2 | 3 | 2     | 2 | 2 | 3 | 3    | 2 | 3 | 3 |   |
| C2        | 2 | 0      | 0 | 1 | 0 | 0 | 0 | 2      | 2 | 2 | 2 | 2      | 1 | 2 | 2 | 1      | 1 | 1 | 2 | 1     | 1 | 2 | 2 | 2    | 2 | 2 | 2 |   |

## LEGEND

|           |                                                              |
|-----------|--------------------------------------------------------------|
| 0         | No precursor ion found                                       |
| 1         | Precursor ion found                                          |
| 2         | Precursor ion + 1 fragment ion found                         |
| 3         | Precursor ion + 2 fragment ions found                        |
| S         | Standard solution                                            |
| HILIC POS | Measurements with HILIC and positive electrospray ionization |
| HILIC NEG | Measurements with HILIC and negative electrospray ionization |

Table S3.2. Validation results of lipophilic phycotoxins in shellfish and fish.

| RP POS            | S | blanks |   |   |   |   |   | mussel |   |   |   | cockle |   |   |   | oyster |   |   |   | ensis |   |   |   | fish |   |   |   | S |
|-------------------|---|--------|---|---|---|---|---|--------|---|---|---|--------|---|---|---|--------|---|---|---|-------|---|---|---|------|---|---|---|---|
| MC-HiLR           | 3 | 0      | 0 | 0 | 0 | 0 | 0 | 3      | 3 | 3 | 3 | 3      | 3 | 3 | 3 | 3      | 3 | 3 | 3 | 3     | 3 | 3 | 3 | 3    | 3 | 3 | 3 | 3 |
| MC-HtyR           | 3 | 0      | 0 | 0 | 0 | 0 | 0 | 3      | 3 | 3 | 3 | 3      | 3 | 3 | 3 | 3      | 3 | 3 | 3 | 3     | 3 | 3 | 3 | 3    | 3 | 3 | 3 | 3 |
| MC-LA             | 3 | 0      | 0 | 0 | 0 | 0 | 0 | 3      | 3 | 3 | 3 | 3      | 3 | 3 | 3 | 3      | 3 | 3 | 3 | 3     | 3 | 3 | 3 | 3    | 3 | 3 | 3 | 3 |
| MC-LF             | 3 | 0      | 0 | 0 | 0 | 0 | 0 | 3      | 3 | 3 | 3 | 3      | 3 | 3 | 3 | 3      | 3 | 3 | 3 | 3     | 3 | 3 | 3 | 3    | 3 | 3 | 3 | 3 |
| MC-LR             | 3 | 0      | 0 | 0 | 0 | 0 | 1 | 3      | 3 | 3 | 3 | 3      | 3 | 3 | 3 | 3      | 3 | 3 | 3 | 3     | 3 | 3 | 3 | 3    | 3 | 3 | 3 | 3 |
| MC-LW             | 3 | 0      | 0 | 0 | 0 | 0 | 0 | 3      | 3 | 3 | 3 | 3      | 3 | 3 | 3 | 3      | 3 | 3 | 3 | 3     | 3 | 3 | 3 | 3    | 3 | 3 | 3 | 3 |
| MC-LY             | 3 | 0      | 0 | 0 | 0 | 0 | 0 | 3      | 3 | 3 | 3 | 3      | 3 | 3 | 3 | 3      | 3 | 3 | 3 | 3     | 3 | 3 | 3 | 3    | 3 | 3 | 3 | 3 |
| MC-RR             | 3 | 0      | 0 | 0 | 0 | 0 | 0 | 3      | 3 | 3 | 3 | 3      | 3 | 3 | 3 | 3      | 3 | 3 | 3 | 3     | 3 | 3 | 3 | 3    | 3 | 3 | 3 | 3 |
| MC-WR             | 3 | 0      | 0 | 0 | 0 | 0 | 0 | 3      | 3 | 3 | 3 | 3      | 3 | 3 | 3 | 3      | 3 | 3 | 3 | 3     | 3 | 3 | 3 | 3    | 3 | 3 | 3 | 3 |
| MC-YR             | 3 | 0      | 0 | 0 | 0 | 0 | 0 | 3      | 3 | 3 | 3 | 3      | 3 | 3 | 3 | 3      | 3 | 3 | 3 | 3     | 3 | 3 | 3 | 3    | 3 | 3 | 3 | 3 |
| NOD               | 3 | 0      | 0 | 0 | 0 | 0 | 0 | 3      | 3 | 3 | 3 | 3      | 3 | 3 | 3 | 3      | 3 | 3 | 3 | 3     | 3 | 3 | 3 | 3    | 3 | 3 | 3 | 3 |
| 13,19-didesMeSPXC | 3 | 0      | 0 | 0 | 0 | 0 | 0 | 3      | 3 | 3 | 3 | 3      | 3 | 3 | 3 | 3      | 3 | 3 | 3 | 3     | 3 | 3 | 3 | 3    | 3 | 3 | 3 | 3 |
| SPX1              | 3 | 0      | 0 | 3 | 0 | 0 | 0 | 3      | 3 | 3 | 3 | 3      | 3 | 3 | 3 | 3      | 3 | 3 | 3 | 3     | 3 | 3 | 3 | 3    | 3 | 3 | 3 | 3 |
| 20MeSPXG          | 3 | 0      | 0 | 3 | 0 | 0 | 0 | 3      | 3 | 3 | 3 | 3      | 3 | 3 | 3 | 3      | 3 | 3 | 3 | 3     | 3 | 3 | 3 | 3    | 3 | 3 | 3 | 3 |
| Asp MC-LR         | 3 | 0      | 0 | 0 | 0 | 0 | 0 | 3      | 3 | 3 | 3 | 3      | 3 | 3 | 3 | 3      | 3 | 3 | 3 | 3     | 3 | 3 | 3 | 3    | 3 | 3 | 3 | 3 |
| AZA1              | 3 | 0      | 0 | 0 | 0 | 0 | 0 | 3      | 3 | 3 | 3 | 3      | 3 | 3 | 3 | 3      | 3 | 3 | 3 | 3     | 3 | 3 | 3 | 3    | 3 | 2 | 3 | 3 |
| AZA2              | 3 | 0      | 0 | 0 | 0 | 0 | 0 | 3      | 3 | 3 | 3 | 3      | 3 | 3 | 3 | 3      | 3 | 3 | 3 | 3     | 3 | 3 | 3 | 3    | 3 | 3 | 3 | 3 |
| AZA3              | 3 | 0      | 0 | 0 | 0 | 0 | 0 | 3      | 3 | 3 | 3 | 3      | 3 | 3 | 3 | 3      | 3 | 3 | 3 | 3     | 3 | 3 | 3 | 3    | 3 | 3 | 3 | 3 |
| AZA4              | 3 | 0      | 0 | 0 | 0 | 0 | 0 | 3      | 3 | 3 | 3 | 3      | 3 | 3 | 3 | 3      | 3 | 3 | 3 | 3     | 3 | 3 | 3 | 3    | 3 | 3 | 3 | 3 |
| AZA5              | 3 | 0      | 0 | 0 | 0 | 0 | 0 | 3      | 3 | 3 | 3 | 3      | 3 | 3 | 3 | 3      | 3 | 3 | 3 | 3     | 3 | 3 | 3 | 3    | 1 | 1 | 3 | 3 |
| GYM               | 3 | 0      | 0 | 0 | 0 | 0 | 0 | 3      | 3 | 3 | 3 | 3      | 3 | 3 | 3 | 3      | 3 | 3 | 3 | 3     | 3 | 3 | 3 | 3    | 3 | 3 | 3 | 3 |
| OA methyl ester   | 3 | 0      | 0 | 0 | 0 | 0 | 0 | 2      | 3 | 3 | 3 | 3      | 3 | 3 | 3 | 3      | 3 | 3 | 3 | 3     | 3 | 3 | 3 | 3    | 3 | 3 | 3 | 3 |
| OA Cs-diol ester  | 3 | 0      | 0 | 0 | 0 | 0 | 1 | 3      | 3 | 3 | 3 | 3      | 3 | 3 | 3 | 3      | 3 | 3 | 3 | 3     | 3 | 3 | 2 | 3    | 3 | 2 | 3 | 3 |
| PTX2              | 3 | 0      | 0 | 0 | 0 | 0 | 0 | 3      | 3 | 3 | 3 | 3      | 3 | 3 | 3 | 2      | 3 | 2 | 3 | 2     | 3 | 2 | 3 | 2    | 2 | 2 | 2 | 3 |
| PnTX E            | 3 | 0      | 0 | 0 | 0 | 0 | 0 | 3      | 3 | 3 | 3 | 3      | 3 | 3 | 3 | 3      | 3 | 3 | 3 | 3     | 3 | 3 | 3 | 3    | 3 | 3 | 3 | 3 |
| PnTX F            | 3 | 0      | 0 | 0 | 0 | 0 | 0 | 3      | 3 | 3 | 3 | 3      | 3 | 3 | 3 | 3      | 3 | 3 | 3 | 3     | 3 | 3 | 3 | 3    | 3 | 3 | 3 | 3 |
| PnTX G            | 3 | 0      | 0 | 3 | 0 | 0 | 0 | 3      | 3 | 3 | 3 | 3      | 3 | 3 | 3 | 3      | 3 | 3 | 3 | 3     | 3 | 3 | 3 | 3    | 3 | 3 | 3 | 3 |
| RP NEG            |   |        |   |   |   |   |   |        |   |   |   |        |   |   |   |        |   |   |   |       |   |   |   |      |   |   |   |   |
| 16:0 OA ester     | 1 | 0      | 0 | 0 | 0 | 0 | 0 | 1      | 1 | 1 | 1 | 1      | 1 | 1 | 1 | 1      | 1 | 1 | 1 | 1     | 1 | 1 | 1 | 1    | 1 | 1 | 1 | 1 |
| hYTX              | 3 | 0      | 0 | 0 | 0 | 0 | 0 | 2      | 3 | 3 | 2 | 2      | 3 | 2 | 3 | 3      | 2 | 2 | 2 | 2     | 2 | 3 | 3 | 3    | 3 | 3 | 2 | 3 |
| DTX1              | 3 | 0      | 0 | 0 | 0 | 0 | 0 | 3      | 3 | 3 | 3 | 3      | 3 | 3 | 3 | 3      | 3 | 3 | 3 | 3     | 3 | 3 | 3 | 3    | 3 | 3 | 3 | 3 |
| DTX2              | 3 | 0      | 0 | 0 | 0 | 0 | 0 | 3      | 3 | 3 | 3 | 3      | 3 | 3 | 3 | 3      | 3 | 3 | 3 | 3     | 3 | 3 | 3 | 3    | 3 | 3 | 3 | 3 |
| OA                | 3 | 0      | 0 | 0 | 0 | 0 | 0 | 3      | 3 | 3 | 3 | 3      | 3 | 3 | 3 | 3      | 3 | 3 | 3 | 3     | 3 | 3 | 3 | 3    | 3 | 3 | 3 | 3 |
| YTX               | 3 | 0      | 0 | 0 | 0 | 0 | 0 | 2      | 2 | 3 | 3 | 0      | 2 | 3 | 2 | 2      | 2 | 0 | 2 | 2     | 2 | 2 | 3 | 2    | 2 | 2 | 3 | 3 |

## LEGEND

|        |                                                                          |
|--------|--------------------------------------------------------------------------|
| 0      | No precursor ion found                                                   |
| 1      | Precursor ion found                                                      |
| 2      | Precursor ion + 1 fragment ion found                                     |
| 3      | Precursor ion + 2 fragment ions found                                    |
| S      | Standard solution                                                        |
| RP POS | Measurements with reversed phase LC and positive electrospray ionization |
| RP NEG | Measurements with reversed phase LC and negative electrospray ionization |

### Screening of hydrophilic and lipophilic phycotoxins in water

Spiking levels: Hydrophilic phycotoxins 120 µg L<sup>-1</sup>\*

Microcystins 10 µg L<sup>-1</sup>

Other lipophilic phycotoxins 5 µg L<sup>-1</sup>

\*Exceptions: dcGTX3 (27 µg L<sup>-1</sup>), GTX1&4 (159 µg L<sup>-1</sup>), GTX3 (46 µg L<sup>-1</sup>), C2 (36 µg L<sup>-1</sup>)

**Table S3.3.** Validation results of hydrophilic phycotoxins in water.

| HILIC POS | S | blanks |   |   |   |   |   | sea water |   |   |   |   | brackish water |   |   |   |   | fresh water |   |   |   |   | tap | S |   |
|-----------|---|--------|---|---|---|---|---|-----------|---|---|---|---|----------------|---|---|---|---|-------------|---|---|---|---|-----|---|---|
| ATX       | 3 | 0      | 0 | 0 | 0 | 0 | 0 | 2         | 2 | 2 | 2 | 3 | 2              | 2 | 2 | 3 | 2 | 2           | 3 | 3 | 2 | 2 | 3   | 3 | 3 |
| dcNEO     | 3 | 0      | 0 | 0 | 0 | 0 | 0 | 3         | 2 | 3 | 2 | 2 | 3              | 2 | 3 | 3 | 3 | 3           | 3 | 3 | 3 | 3 | 3   | 3 | 3 |
| dcSTX     | 3 | 0      | 0 | 0 | 0 | 0 | 0 | 3         | 3 | 3 | 1 | 2 | 3              | 3 | 3 | 3 | 3 | 3           | 3 | 3 | 3 | 3 | 3   | 3 | 3 |
| NEO       | 3 | 0      | 0 | 0 | 0 | 0 | 0 | 3         | 1 | 3 | 1 | 2 | 3              | 3 | 3 | 3 | 3 | 3           | 3 | 3 | 3 | 3 | 3   | 3 | 3 |
| STX       | 3 | 1      | 0 | 0 | 0 | 0 | 0 | 3         | 3 | 3 | 0 | 3 | 3              | 3 | 3 | 3 | 3 | 3           | 3 | 3 | 3 | 3 | 3   | 3 | 3 |
| TTX       | 3 | 0      | 0 | 0 | 0 | 0 | 0 | 2         | 2 | 2 | 3 | 2 | 3              | 3 | 2 | 2 | 3 | 3           | 3 | 3 | 3 | 2 | 2   | 3 | 3 |
| HILIC NEG |   |        |   |   |   |   |   |           |   |   |   |   |                |   |   |   |   |             |   |   |   |   |     |   |   |
| CYN       | 2 | 0      | 0 | 0 | 0 | 0 | 0 | 2         | 2 | 2 | 2 | 2 | 2              | 2 | 2 | 2 | 2 | 2           | 2 | 2 | 2 | 2 | 2   | 2 | 2 |
| dcGTX2    | 3 | 0      | 0 | 0 | 0 | 0 | 0 | 3         | 3 | 3 | 3 | 1 | 3              | 3 | 3 | 3 | 3 | 3           | 3 | 2 | 3 | 3 | 3   | 3 | 3 |
| dcGTX3    | 3 | 0      | 0 | 0 | 0 | 0 | 0 | 2         | 3 | 1 | 0 | 0 | 3              | 3 | 3 | 2 | 3 | 3           | 2 | 3 | 1 | 3 | 3   | 3 | 3 |
| DA        | 2 | 0      | 0 | 0 | 0 | 0 | 0 | 0         | 2 | 0 | 2 | 0 | 0              | 1 | 0 | 0 | 0 | 0           | 1 | 0 | 0 | 1 | 2   | 1 | 1 |
| GTX1&4    | 3 | 0      | 0 | 0 | 0 | 0 | 0 | 1         | 3 | 1 | 1 | 0 | 2              | 3 | 3 | 2 | 3 | 2           | 3 | 3 | 1 | 3 | 3   | 3 | 3 |
| GTX2      | 3 | 0      | 0 | 0 | 0 | 0 | 0 | 3         | 3 | 3 | 1 | 2 | 3              | 3 | 3 | 3 | 3 | 3           | 3 | 3 | 3 | 3 | 3   | 3 | 3 |
| GTX3      | 3 | 0      | 0 | 0 | 0 | 0 | 0 | 1         | 2 | 2 | 0 | 1 | 1              | 2 | 3 | 3 | 2 | 2           | 2 | 2 | 1 | 2 | 3   | 3 | 3 |
| GTX5      | 3 | 0      | 0 | 0 | 0 | 0 | 0 | 0         | 3 | 0 | 3 | 0 | 0              | 3 | 2 | 2 | 2 | 2           | 2 | 3 | 2 | 3 | 3   | 3 | 3 |
| C1        | 3 | 0      | 0 | 0 | 0 | 0 | 0 | 2         | 3 | 2 | 3 | 1 | 3              | 3 | 3 | 2 | 3 | 3           | 3 | 3 | 3 | 3 | 3   | 3 | 3 |
| C2        | 2 | 0      | 0 | 0 | 0 | 0 | 0 | 1         | 1 | 2 | 2 | 0 | 1              | 2 | 1 | 1 | 1 | 2           | 1 | 2 | 1 | 2 | 2   | 2 | 2 |

#### LEGEND

|           |                                                              |
|-----------|--------------------------------------------------------------|
| 0         | No precursor ion found                                       |
| 1         | Precursor ion found                                          |
| 2         | Precursor ion + 1 fragment ion found                         |
| 3         | Precursor ion + 2 fragment ions found                        |
| S         | Standard solution                                            |
| HILIC POS | Measurements with HILIC and positive electrospray ionization |
| HILIC NEG | Measurements with HILIC and negative electrospray ionization |

Table S3.4. Validation results of lipophilic phycotoxins in water.

| RP POS            | S | blanks |   |   |   |   | sea water |   |   |   |   | brackish water |   |   |   |   | fresh water |   |   |   |   | tap |   |   |   |   | S |
|-------------------|---|--------|---|---|---|---|-----------|---|---|---|---|----------------|---|---|---|---|-------------|---|---|---|---|-----|---|---|---|---|---|
| MC-HiLR           | 3 | 0      | 0 | 0 | 0 | 0 | 0         | 3 | 3 | 3 | 3 | 3              | 3 | 3 | 3 | 3 | 3           | 3 | 3 | 3 | 3 | 3   | 3 | 3 | 3 | 3 |   |
| MC-HtyR           | 3 | 0      | 0 | 0 | 0 | 0 | 0         | 3 | 3 | 3 | 3 | 3              | 3 | 3 | 3 | 3 | 3           | 3 | 3 | 3 | 3 | 3   | 3 | 3 | 3 | 3 |   |
| MC-LA             | 3 | 0      | 0 | 0 | 0 | 0 | 0         | 3 | 3 | 3 | 3 | 3              | 3 | 3 | 3 | 3 | 3           | 3 | 3 | 3 | 3 | 3   | 3 | 3 | 3 | 3 |   |
| MC-LF             | 3 | 0      | 0 | 0 | 0 | 0 | 0         | 3 | 3 | 3 | 3 | 3              | 3 | 3 | 3 | 3 | 3           | 3 | 3 | 3 | 3 | 3   | 3 | 3 | 3 | 3 |   |
| MC-LR             | 3 | 0      | 0 | 0 | 0 | 0 | 0         | 3 | 3 | 3 | 3 | 3              | 3 | 3 | 3 | 3 | 3           | 3 | 3 | 3 | 3 | 3   | 3 | 3 | 3 | 3 |   |
| MC-LW             | 3 | 0      | 0 | 0 | 0 | 0 | 0         | 3 | 3 | 3 | 3 | 3              | 3 | 3 | 3 | 3 | 3           | 3 | 3 | 3 | 3 | 3   | 3 | 3 | 3 | 3 |   |
| MC-LY             | 3 | 0      | 0 | 0 | 0 | 0 | 0         | 3 | 3 | 3 | 3 | 3              | 3 | 3 | 3 | 3 | 3           | 3 | 3 | 3 | 3 | 3   | 3 | 3 | 3 | 3 |   |
| MC-RR             | 3 | 0      | 0 | 0 | 0 | 0 | 0         | 3 | 3 | 3 | 3 | 3              | 3 | 3 | 3 | 3 | 3           | 3 | 3 | 3 | 3 | 3   | 3 | 3 | 3 | 3 |   |
| MC-WR             | 3 | 0      | 0 | 0 | 0 | 0 | 0         | 3 | 3 | 3 | 3 | 3              | 3 | 3 | 3 | 3 | 3           | 3 | 3 | 3 | 3 | 3   | 3 | 3 | 3 | 3 |   |
| MC-YR             | 3 | 0      | 0 | 0 | 0 | 0 | 0         | 3 | 3 | 3 | 3 | 3              | 3 | 3 | 3 | 3 | 3           | 3 | 3 | 3 | 3 | 3   | 3 | 3 | 3 | 3 |   |
| NOD               | 3 | 0      | 0 | 0 | 0 | 0 | 0         | 3 | 3 | 3 | 3 | 3              | 3 | 3 | 3 | 3 | 3           | 3 | 3 | 3 | 3 | 3   | 3 | 3 | 3 | 3 |   |
| 13,19-didesMeSPXC | 3 | 0      | 0 | 0 | 0 | 0 | 0         | 3 | 3 | 3 | 3 | 3              | 3 | 3 | 3 | 3 | 3           | 3 | 3 | 3 | 3 | 3   | 3 | 3 | 3 | 3 |   |
| SPX1              | 3 | 0      | 0 | 3 | 0 | 0 | 0         | 3 | 3 | 3 | 3 | 3              | 3 | 3 | 3 | 3 | 3           | 3 | 3 | 3 | 3 | 3   | 3 | 3 | 3 | 3 |   |
| 20MeSPXG          | 3 | 0      | 0 | 0 | 0 | 0 | 0         | 3 | 3 | 3 | 3 | 3              | 3 | 3 | 3 | 3 | 3           | 3 | 3 | 3 | 3 | 3   | 3 | 3 | 3 | 3 |   |
| Asp MC-LR         | 3 | 0      | 0 | 0 | 0 | 0 | 0         | 3 | 3 | 3 | 3 | 3              | 3 | 3 | 3 | 3 | 3           | 3 | 3 | 3 | 3 | 3   | 3 | 3 | 3 | 3 |   |
| AZA1              | 3 | 0      | 0 | 0 | 0 | 0 | 0         | 3 | 3 | 3 | 3 | 3              | 3 | 3 | 3 | 3 | 3           | 3 | 3 | 3 | 3 | 3   | 3 | 3 | 3 | 3 |   |
| AZA2              | 3 | 0      | 0 | 0 | 0 | 0 | 0         | 3 | 3 | 3 | 3 | 3              | 3 | 3 | 3 | 3 | 3           | 3 | 3 | 3 | 3 | 3   | 3 | 3 | 3 | 3 |   |
| AZA3              | 3 | 0      | 0 | 0 | 0 | 0 | 0         | 3 | 3 | 3 | 3 | 3              | 3 | 3 | 3 | 3 | 3           | 3 | 3 | 3 | 3 | 3   | 3 | 3 | 3 | 3 |   |
| AZA4              | 3 | 0      | 0 | 0 | 0 | 0 | 0         | 3 | 3 | 3 | 3 | 3              | 3 | 3 | 3 | 3 | 3           | 3 | 3 | 3 | 3 | 3   | 3 | 3 | 3 | 3 |   |
| AZA5              | 3 | 0      | 0 | 0 | 0 | 0 | 0         | 3 | 3 | 3 | 3 | 3              | 3 | 3 | 3 | 3 | 3           | 3 | 3 | 3 | 3 | 3   | 3 | 3 | 3 | 3 |   |
| GYM               | 3 | 0      | 0 | 2 | 0 | 0 | 0         | 3 | 3 | 3 | 3 | 3              | 3 | 3 | 3 | 3 | 3           | 3 | 3 | 3 | 3 | 3   | 3 | 3 | 3 | 3 |   |
| OA methyl ester   | 2 | 0      | 0 | 0 | 0 | 0 | 0         | 2 | 2 | 2 | 2 | 2              | 2 | 2 | 3 | 3 | 2           | 2 | 2 | 3 | 3 | 2   | 2 | 3 | 3 | 3 |   |
| OA C8-diol ester  | 3 | 0      | 0 | 0 | 0 | 0 | 0         | 3 | 1 | 3 | 3 | 3              | 3 | 3 | 2 | 2 | 3           | 3 | 3 | 1 | 3 | 2   | 1 | 1 | 2 | 3 |   |
| PTX2              | 3 | 0      | 0 | 0 | 0 | 0 | 0         | 3 | 3 | 3 | 3 | 3              | 3 | 3 | 3 | 3 | 3           | 3 | 3 | 3 | 3 | 3   | 3 | 3 | 3 | 3 |   |
| PnTX E            | 3 | 0      | 0 | 0 | 0 | 0 | 0         | 3 | 3 | 3 | 3 | 3              | 3 | 3 | 3 | 3 | 3           | 3 | 3 | 3 | 3 | 3   | 3 | 3 | 3 | 3 |   |
| PnTX F            | 3 | 0      | 0 | 0 | 0 | 0 | 0         | 3 | 3 | 3 | 3 | 3              | 3 | 3 | 3 | 3 | 3           | 3 | 3 | 3 | 3 | 3   | 3 | 3 | 3 | 3 |   |
| PnTX G            | 3 | 0      | 0 | 0 | 0 | 0 | 0         | 3 | 3 | 3 | 3 | 3              | 3 | 3 | 3 | 3 | 3           | 3 | 3 | 3 | 3 | 3   | 3 | 3 | 3 | 3 |   |
| RP NEG            |   |        |   |   |   |   |           |   |   |   |   |                |   |   |   |   |             |   |   |   |   |     |   |   |   |   |   |
| 16:0 OA ester     | 1 | 0      | 0 | 0 | 0 | 0 | 0         | 0 | 0 | 1 | 1 | 1              | 0 | 0 | 0 | 1 | 0           | 1 | 1 | 0 | 1 | 0   | 0 | 1 | 1 | 0 | 1 |
| hYTX              | 2 | 0      | 0 | 0 | 0 | 0 | 0         | 1 | 0 | 0 | 1 | 1              | 0 | 1 | 0 | 0 | 0           | 0 | 0 | 1 | 0 | 1   | 0 | 0 | 0 | 0 | 3 |
| DTX1              | 3 | 0      | 0 | 0 | 0 | 0 | 0         | 3 | 3 | 3 | 3 | 3              | 3 | 3 | 3 | 3 | 3           | 3 | 3 | 3 | 3 | 3   | 3 | 3 | 3 | 3 |   |
| DTX2              | 3 | 0      | 0 | 0 | 0 | 0 | 0         | 3 | 3 | 3 | 3 | 3              | 3 | 3 | 3 | 3 | 3           | 3 | 3 | 3 | 3 | 3   | 3 | 3 | 3 | 3 |   |
| OA                | 3 | 0      | 0 | 0 | 0 | 0 | 0         | 3 | 3 | 3 | 3 | 3              | 3 | 3 | 3 | 3 | 3           | 3 | 3 | 3 | 3 | 3   | 3 | 3 | 3 | 3 |   |
| YTX               | 1 | 0      | 0 | 0 | 0 | 0 | 0         | 0 | 0 | 0 | 0 | 0              | 0 | 1 | 0 | 0 | 0           | 0 | 1 | 0 | 0 | 0   | 0 | 0 | 0 | 0 | 2 |
| DA                | 2 | 0      | 0 | 0 | 0 | 0 | 0         | 0 | 0 | 0 | 0 | 0              | 0 | 0 | 0 | 0 | 0           | 0 | 0 | 1 | 0 | 0   | 0 | 0 | 0 | 1 | 2 |

## LEGEND

|        |                                                                          |
|--------|--------------------------------------------------------------------------|
| 0      | No precursor ion found                                                   |
| 1      | Precursor ion found                                                      |
| 2      | Precursor ion + 1 fragment ion found                                     |
| 3      | Precursor ion + 2 fragment ions found                                    |
| S      | Standard solution                                                        |
| RP POS | Measurements with reversed phase LC and positive electrospray ionization |
| RP NEG | Measurements with reversed phase LC and negative electrospray ionization |

## Screening of lipophilic phycotoxins in food supplements

Spiking levels: Microcystins 30 µg L<sup>-1</sup> for solids and 50 µg L<sup>-1</sup> for liquidsOther lipophilic phycotoxins 15 µg L<sup>-1</sup>

**Table S3.5.** Main ingredient or ingredient of interest in samples used for validation food supplements.

| <b>Solid</b>                | <b>Liquid</b>            |
|-----------------------------|--------------------------|
| Microalgae powder           | Oil from microalgae      |
| Microalgae powder           | Oil from microalgae      |
| Chlorella powder            | Oil from microalgae      |
| Green lipped mussel         | Fish oil                 |
| Chlorella                   | Fish oil                 |
| Green lipped mussel         | Green lipped mussel      |
| Green lipped mussel extract | Astaxanthine             |
| Bladderwrack                | Oyster extract           |
| Oyster extract              | Algae oil                |
| Kelp                        | Red oil                  |
| Seaweed                     | Red krill oil            |
| Chlorella                   | Green lipped mussel      |
| Chlorella                   | Klamath blue green algae |
| Spirulina                   | Salmon oil               |
| Chlorella                   | Omega 3 fish oil         |
| Spirulina                   | Triple omega 3, 6, 9     |
| Chlorella                   | Fish oil EPA50% DHA 25%  |
| Vitamins                    | Fish oil                 |
| Chlorella                   | Multi vitamins           |
| Green lipped mussel         | Cod liver oil            |

Table S3.6. Validation results of lipophilic phycotoxins in solid food supplements.

| RP POS            | S | blanks |   |   |   |   |   |   |   |   |   | solid food supplements |   |   |   |   |   |   |   |   |   |   |   |   |   |   |   |   |   | S |  |  |
|-------------------|---|--------|---|---|---|---|---|---|---|---|---|------------------------|---|---|---|---|---|---|---|---|---|---|---|---|---|---|---|---|---|---|--|--|
| MC-HilR           | 3 | 0      | 0 | 0 | 0 | 2 | 2 | 2 | 0 | 0 | 0 | 0                      | 0 | 0 | 2 | 0 | 0 | 0 | 0 | 0 | 0 | 0 | 0 | 0 | 0 | 0 | 0 | 3 | 3 |   |  |  |
| MC-HtyR           | 3 | 0      | 0 | 0 | 0 | 3 | 0 | 2 | 3 | 0 | 3 | 2                      | 0 | 3 | 0 | 3 | 0 | 0 | 0 | 0 | 0 | 0 | 0 | 0 | 0 | 0 | 0 | 3 | 3 |   |  |  |
| MC-LA             | 3 | 0      | 0 | 0 | 0 | 0 | 0 | 0 | 0 | 1 | 0 | 0                      | 2 | 0 | 0 | 0 | 0 | 0 | 0 | 0 | 0 | 0 | 0 | 0 | 0 | 0 | 2 | 0 | 3 |   |  |  |
| MC-LF             | 3 | 0      | 0 | 2 | 0 | 0 | 0 | 0 | 0 | 0 | 0 | 0                      | 1 | 0 | 1 | 0 | 0 | 0 | 0 | 0 | 0 | 0 | 0 | 0 | 0 | 0 | 2 | 3 |   |   |  |  |
| MC-LR             | 3 | 0      | 0 | 0 | 0 | 0 | 1 | 1 | 0 | 0 | 0 | 0                      | 0 | 1 | 2 | 1 | 0 | 0 | 0 | 0 | 0 | 0 | 0 | 0 | 0 | 0 | 2 | 3 |   |   |  |  |
| MC-LW             | 3 | 0      | 0 | 0 | 0 | 0 | 0 | 0 | 0 | 0 | 0 | 0                      | 0 | 0 | 3 | 2 | 0 | 0 | 0 | 0 | 0 | 0 | 0 | 0 | 0 | 0 | 3 | 3 |   |   |  |  |
| MC-LY             | 3 | 0      | 0 | 0 | 0 | 0 | 0 | 0 | 0 | 0 | 0 | 0                      | 3 | 0 | 2 | 0 | 0 | 0 | 0 | 0 | 0 | 0 | 0 | 0 | 0 | 0 | 3 | 3 |   |   |  |  |
| MC-RR             | 3 | 0      | 0 | 0 | 0 | 0 | 2 | 2 | 3 | 2 | 1 | 1                      | 1 | 2 | 2 | 3 | 2 | 1 | 1 | 2 | 1 | 2 | 1 | 3 | 1 | 3 | 3 | 3 |   |   |  |  |
| MC-WR             | 3 | 0      | 0 | 0 | 0 | 0 | 0 | 1 | 0 | 0 | 1 | 0                      | 0 | 0 | 0 | 2 | 2 | 0 | 0 | 0 | 0 | 0 | 0 | 1 | 0 | 2 | 3 | 3 |   |   |  |  |
| MC-YR             | 3 | 0      | 0 | 0 | 0 | 0 | 1 | 0 | 3 | 0 | 0 | 0                      | 0 | 3 | 0 | 3 | 0 | 0 | 0 | 0 | 0 | 0 | 0 | 0 | 0 | 3 | 3 | 3 |   |   |  |  |
| NOD               | 3 | 0      | 0 | 0 | 0 | 0 | 1 | 1 | 3 | 2 | 1 | 2                      | 1 | 2 | 1 | 3 | 3 | 1 | 1 | 0 | 1 | 1 | 1 | 0 | 1 | 3 | 3 | 3 |   |   |  |  |
| 13,19-didesMeSPXC | 3 | 0      | 0 | 0 | 0 | 0 | 3 | 3 | 3 | 3 | 3 | 3                      | 2 | 2 | 2 | 2 | 2 | 3 | 3 | 3 | 2 | 3 | 3 | 2 | 3 | 3 | 3 | 3 |   |   |  |  |
| SPX1              | 3 | 0      | 0 | 0 | 2 | 0 | 2 | 2 | 2 | 2 | 2 | 3                      | 3 | 2 | 2 | 2 | 3 | 3 | 2 | 2 | 2 | 2 | 2 | 2 | 2 | 3 | 3 | 3 |   |   |  |  |
| 20MeSPXG          | 3 | 0      | 0 | 0 | 0 | 0 | 2 | 3 | 3 | 2 | 2 | 3                      | 3 | 3 | 3 | 2 | 3 | 3 | 2 | 2 | 2 | 1 | 2 | 3 | 3 | 3 | 3 | 3 |   |   |  |  |
| Asp MC-LR         | 3 | 0      | 0 | 0 | 0 | 0 | 1 | 1 | 2 | 2 | 0 | 1                      | 1 | 3 | 0 | 1 | 0 | 0 | 0 | 0 | 0 | 0 | 1 | 0 | 1 | 1 | 3 | 3 |   |   |  |  |
| AZA1              | 3 | 0      | 0 | 0 | 0 | 0 | 2 | 1 | 2 | 1 | 0 | 2                      | 3 | 1 | 3 | 1 | 2 | 1 | 0 | 1 | 0 | 1 | 1 | 1 | 1 | 3 | 3 | 3 |   |   |  |  |
| AZA2              | 3 | 0      | 0 | 0 | 0 | 0 | 1 | 1 | 3 | 1 | 0 | 1                      | 3 | 1 | 3 | 1 | 2 | 1 | 1 | 1 | 0 | 2 | 1 | 1 | 2 | 1 | 3 | 3 |   |   |  |  |
| AZA3              | 3 | 0      | 1 | 0 | 0 | 0 | 1 | 1 | 2 | 1 | 0 | 3                      | 3 | 2 | 3 | 1 | 2 | 0 | 0 | 1 | 0 | 1 | 0 | 1 | 1 | 2 | 3 | 3 |   |   |  |  |
| AZA4              | 3 | 0      | 0 | 0 | 0 | 0 | 1 | 1 | 1 | 1 | 0 | 1                      | 1 | 1 | 3 | 1 | 2 | 1 | 0 | 1 | 0 | 1 | 0 | 1 | 1 | 3 | 3 | 3 |   |   |  |  |
| AZA5              | 3 | 0      | 0 | 0 | 0 | 0 | 2 | 1 | 1 | 1 | 1 | 1                      | 2 | 1 | 2 | 1 | 1 | 1 | 0 | 1 | 0 | 1 | 0 | 1 | 1 | 1 | 3 | 3 |   |   |  |  |
| GYM               | 3 | 0      | 3 | 0 | 2 | 0 | 2 | 2 | 3 | 1 | 3 | 3                      | 3 | 3 | 1 | 2 | 1 | 3 | 2 | 1 | 1 | 2 | 2 | 1 | 3 | 3 | 3 | 3 |   |   |  |  |
| OA methyl ester   | 3 | 0      | 0 | 0 | 0 | 0 | 1 | 1 | 1 | 2 | 0 | 1                      | 1 | 1 | 2 | 1 | 2 | 0 | 0 | 0 | 1 | 1 | 0 | 0 | 0 | 2 | 2 | 2 |   |   |  |  |
| OA C8-diol ester  | 3 | 0      | 0 | 0 | 1 | 0 | 0 | 1 | 1 | 0 | 0 | 0                      | 1 | 2 | 1 | 2 | 1 | 0 | 1 | 0 | 0 | 0 | 0 | 0 | 0 | 1 | 3 | 3 |   |   |  |  |
| PTX2              | 3 | 0      | 0 | 0 | 0 | 0 | 1 | 1 | 2 | 1 | 2 | 0                      | 2 | 2 | 2 | 2 | 2 | 0 | 1 | 0 | 2 | 1 | 0 | 2 | 1 | 3 | 3 | 3 |   |   |  |  |
| PnTX E            | 3 | 0      | 0 | 0 | 0 | 0 | 2 | 2 | 2 | 2 | 2 | 2                      | 2 | 2 | 0 | 2 | 2 | 2 | 2 | 2 | 2 | 2 | 2 | 2 | 2 | 2 | 3 | 3 |   |   |  |  |
| PnTX F            | 3 | 0      | 0 | 0 | 0 | 0 | 2 | 2 | 3 | 2 | 2 | 2                      | 2 | 2 | 2 | 2 | 3 | 2 | 2 | 2 | 1 | 1 | 2 | 2 | 2 | 3 | 3 | 3 |   |   |  |  |
| PnTX G            | 3 | 0      | 0 | 0 | 0 | 0 | 3 | 2 | 3 | 3 | 2 | 3                      | 3 | 3 | 3 | 3 | 3 | 3 | 2 | 2 | 1 | 2 | 2 | 3 | 3 | 3 | 3 | 3 |   |   |  |  |
| RP NEG            |   |        |   |   |   |   |   |   |   |   |   |                        |   |   |   |   |   |   |   |   |   |   |   |   |   |   |   |   |   |   |  |  |
| 16:0 OA ester     | 1 | 0      | 0 | 0 | 0 | 0 | 0 | 0 | 0 | 0 | 0 | 0                      | 0 | 0 | 0 | 0 | 0 | 0 | 0 | 0 | 1 | 0 | 0 | 0 | 0 | 0 | 1 | 1 |   |   |  |  |
| hYTX              | 3 | 0      | 0 | 0 | 0 | 0 | 0 | 0 | 0 | 0 | 0 | 0                      | 0 | 0 | 0 | 0 | 0 | 0 | 0 | 0 | 0 | 0 | 0 | 0 | 0 | 0 | 3 | 3 |   |   |  |  |
| DTX1              | 3 | 0      | 0 | 0 | 0 | 0 | 2 | 2 | 3 | 2 | 2 | 0                      | 0 | 2 | 2 | 3 | 0 | 1 | 2 | 0 | 0 | 0 | 2 | 0 | 2 | 3 | 3 | 3 |   |   |  |  |
| DTX2              | 3 | 0      | 0 | 0 | 0 | 0 | 2 | 3 | 2 | 2 | 0 | 0                      | 2 | 3 | 2 | 3 | 3 | 0 | 0 | 0 | 0 | 0 | 0 | 1 | 1 | 2 | 3 | 3 |   |   |  |  |
| OA                | 3 | 0      | 0 | 0 | 0 | 0 | 3 | 3 | 3 | 3 | 1 | 2                      | 3 | 3 | 2 | 3 | 3 | 2 | 1 | 0 | 0 | 0 | 1 | 1 | 2 | 3 | 3 | 3 |   |   |  |  |
| YTX               | 3 | 0      | 0 | 0 | 0 | 0 | 1 | 0 | 1 | 0 | 0 | 0                      | 0 | 0 | 0 | 0 | 0 | 0 | 0 | 0 | 0 | 0 | 0 | 0 | 0 | 0 | 3 | 3 |   |   |  |  |

## LEGEND

|        |                                                                          |
|--------|--------------------------------------------------------------------------|
| 0      | No precursor ion found                                                   |
| 1      | Precursor ion found                                                      |
| 2      | Precursor ion + 1 fragment ion found                                     |
| 3      | Precursor ion + 2 fragment ions found                                    |
| S      | Standard solution                                                        |
| RP POS | Measurements with reversed phase LC and positive electrospray ionization |
| RP NEG | Measurements with reversed phase LC and negative electrospray ionization |

Table S3.7. Validation results of lipophilic phycotoxins in liquid food supplements.

| RP POS            | S | blanks |   |   |   |   |   | liquid food supplements |   |   |   |   |   |   |   |   |   |   |   |   |   |   |   |   |   |   |   | S |
|-------------------|---|--------|---|---|---|---|---|-------------------------|---|---|---|---|---|---|---|---|---|---|---|---|---|---|---|---|---|---|---|---|
| MC-HilR           | 3 | 0      | 0 | 0 | 0 | 0 | 0 | 3                       | 3 | 3 | 3 | 3 | 3 | 3 | 3 | 3 | 3 | 3 | 3 | 3 | 3 | 3 | 3 | 3 | 3 | 3 | 3 |   |
| MC-HtyR           | 3 | 0      | 0 | 0 | 0 | 0 | 0 | 3                       | 3 | 3 | 3 | 3 | 3 | 3 | 3 | 3 | 3 | 3 | 3 | 3 | 3 | 3 | 3 | 3 | 3 | 3 | 3 |   |
| MC-LA             | 3 | 0      | 0 | 0 | 0 | 0 | 0 | 3                       | 3 | 3 | 3 | 3 | 0 | 3 | 2 | 3 | 0 | 0 | 0 | 2 | 3 | 0 | 3 | 3 | 3 | 0 | 3 | 3 |
| MC-LF             | 3 | 0      | 0 | 0 | 0 | 0 | 0 | 3                       | 3 | 3 | 3 | 3 | 0 | 3 | 3 | 3 | 0 | 0 | 0 | 3 | 3 | 3 | 3 | 3 | 3 | 2 | 3 | 3 |
| MC-LR             | 3 | 0      | 0 | 0 | 0 | 0 | 0 | 3                       | 3 | 3 | 3 | 3 | 3 | 3 | 3 | 3 | 0 | 0 | 1 | 2 | 3 | 3 | 3 | 3 | 3 | 2 | 3 | 3 |
| MC-LW             | 3 | 0      | 0 | 0 | 0 | 0 | 0 | 3                       | 3 | 3 | 3 | 3 | 0 | 3 | 3 | 3 | 0 | 0 | 0 | 3 | 3 | 3 | 3 | 0 | 3 | 2 | 3 | 3 |
| MC-LY             | 3 | 0      | 0 | 0 | 0 | 0 | 0 | 3                       | 3 | 3 | 3 | 3 | 0 | 3 | 2 | 3 | 0 | 0 | 0 | 3 | 3 | 0 | 3 | 0 | 3 | 2 | 3 | 3 |
| MC-RR             | 3 | 0      | 0 | 0 | 0 | 0 | 0 | 3                       | 3 | 3 | 3 | 3 | 3 | 3 | 3 | 3 | 3 | 3 | 3 | 3 | 3 | 3 | 3 | 3 | 3 | 0 | 3 | 3 |
| MC-WR             | 3 | 0      | 0 | 0 | 0 | 0 | 0 | 3                       | 3 | 3 | 3 | 3 | 3 | 3 | 2 | 3 | 0 | 3 | 3 | 3 | 3 | 3 | 3 | 3 | 3 | 0 | 3 | 3 |
| MC-YR             | 3 | 0      | 0 | 0 | 0 | 0 | 0 | 3                       | 3 | 3 | 3 | 3 | 3 | 3 | 3 | 3 | 0 | 0 | 3 | 3 | 3 | 3 | 3 | 3 | 3 | 0 | 3 | 3 |
| NOD               | 3 | 0      | 0 | 0 | 0 | 0 | 0 | 3                       | 3 | 3 | 3 | 3 | 3 | 3 | 3 | 3 | 0 | 2 | 3 | 2 | 3 | 3 | 3 | 3 | 3 | 2 | 3 | 3 |
| 13,19-didesMeSPXC | 3 | 0      | 0 | 0 | 0 | 0 | 0 | 3                       | 3 | 3 | 3 | 3 | 3 | 3 | 3 | 3 | 3 | 3 | 3 | 3 | 3 | 3 | 3 | 3 | 3 | 3 | 3 | 3 |
| SPX1              | 3 | 0      | 0 | 0 | 0 | 0 | 0 | 3                       | 3 | 3 | 3 | 3 | 3 | 3 | 3 | 3 | 3 | 3 | 3 | 3 | 3 | 3 | 3 | 3 | 3 | 3 | 3 | 3 |
| 20MeSPXG          | 3 | 0      | 0 | 0 | 0 | 0 | 0 | 3                       | 3 | 3 | 3 | 3 | 3 | 3 | 3 | 3 | 2 | 3 | 3 | 3 | 3 | 3 | 3 | 3 | 3 | 3 | 3 | 3 |
| Asp MC-LR         | 3 | 0      | 0 | 0 | 0 | 0 | 0 | 3                       | 3 | 3 | 3 | 3 | 3 | 3 | 3 | 3 | 0 | 3 | 1 | 1 | 3 | 3 | 3 | 3 | 3 | 1 | 3 | 3 |
| AZA1              | 3 | 0      | 0 | 0 | 0 | 0 | 0 | 3                       | 3 | 3 | 3 | 3 | 1 | 3 | 2 | 3 | 0 | 1 | 1 | 3 | 3 | 3 | 1 | 3 | 3 | 2 | 3 | 3 |
| AZA2              | 3 | 0      | 0 | 0 | 0 | 0 | 0 | 3                       | 3 | 3 | 3 | 3 | 2 | 3 | 2 | 3 | 1 | 1 | 1 | 3 | 3 | 1 | 3 | 3 | 3 | 1 | 3 | 3 |
| AZA3              | 3 | 0      | 0 | 0 | 0 | 0 | 0 | 3                       | 3 | 3 | 3 | 3 | 2 | 3 | 3 | 3 | 1 | 1 | 1 | 3 | 3 | 2 | 2 | 3 | 3 | 3 | 3 | 3 |
| AZA4              | 3 | 0      | 0 | 0 | 0 | 0 | 0 | 3                       | 3 | 3 | 3 | 3 | 3 | 1 | 3 | 3 | 0 | 0 | 1 | 3 | 3 | 3 | 3 | 3 | 3 | 1 | 3 | 3 |
| AZA5              | 3 | 0      | 0 | 0 | 0 | 0 | 0 | 3                       | 3 | 3 | 3 | 3 | 3 | 1 | 1 | 3 | 1 | 1 | 1 | 3 | 3 | 3 | 3 | 3 | 3 | 1 | 3 | 3 |
| GYM               | 3 | 0      | 0 | 0 | 0 | 0 | 0 | 3                       | 3 | 3 | 3 | 3 | 3 | 3 | 3 | 3 | 3 | 3 | 3 | 1 | 3 | 3 | 3 | 3 | 3 | 3 | 3 | 3 |
| OA methyl ester   | 2 | 0      | 0 | 0 | 0 | 0 | 0 | 2                       | 2 | 3 | 2 | 2 | 1 | 1 | 1 | 2 | 0 | 0 | 1 | 2 | 2 | 0 | 0 | 0 | 2 | 1 | 2 | 2 |
| OA C8-diol ester  | 3 | 0      | 0 | 0 | 0 | 0 | 0 | 2                       | 1 | 2 | 2 | 3 | 1 | 3 | 3 | 2 | 0 | 1 | 1 | 2 | 2 | 0 | 0 | 0 | 2 | 1 | 2 | 3 |
| PTX2              | 3 | 0      | 0 | 0 | 0 | 0 | 0 | 3                       | 3 | 3 | 3 | 3 | 2 | 1 | 2 | 3 | 0 | 0 | 1 | 3 | 3 | 2 | 2 | 2 | 3 | 1 | 3 | 3 |
| PnTX E            | 3 | 0      | 0 | 0 | 0 | 0 | 0 | 3                       | 3 | 3 | 3 | 3 | 3 | 3 | 3 | 3 | 0 | 2 | 2 | 2 | 3 | 3 | 3 | 3 | 3 | 2 | 3 | 3 |
| PnTX F            | 3 | 0      | 0 | 0 | 0 | 0 | 0 | 3                       | 3 | 3 | 3 | 3 | 3 | 3 | 3 | 3 | 2 | 2 | 2 | 3 | 3 | 3 | 3 | 3 | 3 | 2 | 3 | 3 |
| PnTX G            | 3 | 0      | 0 | 0 | 0 | 0 | 0 | 3                       | 3 | 3 | 3 | 3 | 3 | 3 | 3 | 3 | 2 | 3 | 3 | 3 | 3 | 3 | 3 | 3 | 3 | 3 | 3 | 3 |
| RP NEG            |   |        |   |   |   |   |   |                         |   |   |   |   |   |   |   |   |   |   |   |   |   |   |   |   |   |   |   |   |
| 16:0 OA ester     | 1 | 0      | 0 | 0 | 0 | 0 | 0 | 0                       | 0 | 0 | 0 | 0 | 1 | 0 | 0 | 0 | 0 | 0 | 0 | 0 | 0 | 0 | 0 | 0 | 0 | 0 | 0 | 0 |
| hYTX              | 3 | 0      | 0 | 0 | 0 | 0 | 0 | 3                       | 3 | 3 | 2 | 2 | 0 | 0 | 0 | 3 | 0 | 0 | 0 | 1 | 2 | 1 | 1 | 1 | 2 | 0 | 1 | 2 |
| DTX1              | 3 | 0      | 0 | 0 | 0 | 0 | 0 | 3                       | 3 | 3 | 3 | 3 | 0 | 3 | 3 | 0 | 0 | 0 | 0 | 3 | 3 | 3 | 3 | 3 | 3 | 0 | 3 | 3 |
| DTX2              | 3 | 0      | 0 | 0 | 0 | 0 | 0 | 3                       | 3 | 3 | 3 | 3 | 2 | 3 | 3 | 3 | 0 | 2 | 3 | 3 | 3 | 3 | 3 | 3 | 3 | 1 | 3 | 3 |
| OA                | 3 | 0      | 0 | 0 | 0 | 0 | 0 | 3                       | 3 | 3 | 3 | 3 | 3 | 3 | 3 | 3 | 0 | 0 | 3 | 3 | 3 | 3 | 3 | 3 | 3 | 0 | 3 | 3 |
| YTX               | 3 | 0      | 0 | 0 | 0 | 0 | 0 | 2                       | 2 | 2 | 1 | 1 | 0 | 0 | 0 | 2 | 0 | 0 | 0 | 1 | 2 | 1 | 0 | 1 | 1 | 0 | 0 | 2 |

## LEGEND

|        |                                                                          |
|--------|--------------------------------------------------------------------------|
| 0      | No precursor ion found                                                   |
| 1      | Precursor ion found                                                      |
| 2      | Precursor ion + 1 fragment ion found                                     |
| 3      | Precursor ion + 2 fragment ions found                                    |
| S      | Standard solution                                                        |
| RP POS | Measurements with reversed phase LC and positive electrospray ionization |
| RP NEG | Measurements with reversed phase LC and negative electrospray ionization |



Table S3.8. summary Validated levels screening.

| Compound                      | (Shell) fish<br>( $\mu\text{g kg}^{-1}$ ) | Water<br>( $\mu\text{g L}^{-1}$ ) | Food supplements<br>solids ( $\mu\text{g kg}^{-1}$ ) | Food supplements<br>liquids ( $\mu\text{g kg}^{-1}$ ) |
|-------------------------------|-------------------------------------------|-----------------------------------|------------------------------------------------------|-------------------------------------------------------|
| <b>HILIC POS</b>              |                                           |                                   |                                                      |                                                       |
| ATX                           | 600                                       | 120                               | n.p.                                                 | n.p.                                                  |
| dcNEO                         | 600                                       | 120                               | n.p.                                                 | n.p.                                                  |
| dcSTX                         | 600                                       | 120                               | n.p.                                                 | n.p.                                                  |
| NEO                           | 600                                       | 120                               | n.p.                                                 | n.p.                                                  |
| STX                           | 600                                       | 120                               | n.p.                                                 | n.p.                                                  |
| TTX                           | 600 (except<br>ensis)                     | 120                               | n.p.                                                 | n.p.                                                  |
| <b>HILIC NEG</b>              |                                           |                                   |                                                      |                                                       |
| CYN                           | *                                         | 120                               | n.p.                                                 | n.p.                                                  |
| dcGTX2                        | 600                                       | 120                               | n.p.                                                 | n.p.                                                  |
| dcGTX3                        | 134                                       | 27                                | n.p.                                                 | n.p.                                                  |
| DA                            | 600                                       | *                                 | n.p.                                                 | n.p.                                                  |
| GTX1&4                        | 795                                       | 159                               | n.p.                                                 | n.p.                                                  |
| GTX2                          | 600                                       | 120                               | n.p.                                                 | n.p.                                                  |
| GTX3                          | 228                                       | 46                                | n.p.                                                 | n.p.                                                  |
| GTX5                          | 600                                       | 120                               | n.p.                                                 | n.p.                                                  |
| C1                            | 600 (except<br>mussel)                    | 120                               | n.p.                                                 | n.p.                                                  |
| C2                            | *                                         | *                                 | n.p.                                                 | n.p.                                                  |
| <b>RP POS</b>                 |                                           |                                   |                                                      |                                                       |
| MC-HilR                       | 150                                       | 10                                | *                                                    | *                                                     |
| MC-HtyR                       | 150                                       | 10                                | *                                                    | *                                                     |
| MC-LA                         | 150                                       | 10                                | *                                                    | *                                                     |
| MC-LF                         | 150                                       | 10                                | *                                                    | *                                                     |
| MC-LR                         | 150                                       | 10                                | *                                                    | *                                                     |
| MC-LW                         | 150                                       | 10                                | *                                                    | *                                                     |
| MC-LY                         | 150                                       | 10                                | *                                                    | *                                                     |
| MC-RR                         | 150                                       | 10                                | *                                                    | 50                                                    |
| MC-WR                         | 150                                       | 10                                | *                                                    | *                                                     |
| MC-YR                         | 150                                       | 10                                | *                                                    | *                                                     |
| NOD                           | 150                                       | 10                                | *                                                    | 50                                                    |
| 13,19-<br>didesMeSPXC         | 80                                        | 5                                 | 15                                                   | 15                                                    |
| SPX1                          | 80                                        | 5                                 | 15                                                   | 15                                                    |
| 20MeSPXG                      | 80                                        | 5                                 | 15                                                   | 15                                                    |
| Asp MC-LR                     | 150                                       | 10                                | *                                                    | *                                                     |
| AZA1                          | 80                                        | 5                                 | *                                                    | *                                                     |
| AZA2                          | 80                                        | 5                                 | *                                                    | *                                                     |
| AZA3                          | 80                                        | 5                                 | *                                                    | *                                                     |
| AZA4                          | 80                                        | 5                                 | *                                                    | *                                                     |
| AZA5                          | 80 (except fish)                          | 5                                 | *                                                    | *                                                     |
| GYM                           | 80                                        | 5                                 | *                                                    | 15                                                    |
| OA methyl ester               | 80                                        | 5                                 | *                                                    | *                                                     |
| OA C <sub>8</sub> -diol ester | 80                                        | *                                 | *                                                    | *                                                     |
| PTX2                          | 80                                        | 5                                 | *                                                    | *                                                     |

|               |    |   |    |    |
|---------------|----|---|----|----|
| PnTX E        | 80 | 5 | 15 | 15 |
| PnTX F        | 80 | 5 | 15 | 15 |
| PnTX G        | 80 | 5 | 15 | 15 |
| <b>RP NEG</b> |    |   |    |    |
| 16:0 OA ester | *  | * | *  | *  |
| hYTX          | 80 | * | *  | *  |
| DTX1          | 80 | 5 | *  | *  |
| DTX2          | 80 | 5 | *  | *  |
| OA            | 80 | 5 | *  | *  |
| YTX           | *  | * | *  | *  |

\* no satisfactory results

n.p. not performed

## Quantitation of ASP, PSP and DSP in tissue

Table S3.9. spike levels of ASP, PSP and DSP for quantitative validation in shellfish.

| Compound                                                                                        | Toxin group | 0.5 (ug kg <sup>-1</sup> ) | 1 (ug kg <sup>-1</sup> ) | Matrix matched standards (ug kg <sup>-1</sup> ) |
|-------------------------------------------------------------------------------------------------|-------------|----------------------------|--------------------------|-------------------------------------------------|
| DA                                                                                              | ASP         | 10,000                     | 20,000                   | 0, 5,000, 10,000, 20,000, 50,000                |
| STX, dcSTX, NEO, dcNEO, GTX1&4 <sup>1</sup> , GTX2&3 <sup>1</sup> , GTX5, dcGTX2&3 <sup>1</sup> | PSP         | 400                        | 800                      | 0, 400, 600, 800, 1200                          |
| OA, DTX1, DTX2                                                                                  | DSP         | 80                         | 160                      | 0, 20, 40, 80, 160, 240                         |
| AZA1, AZA2, AZA3                                                                                |             | 80                         | 160                      | 0, 20, 40, 80, 160, 240                         |
| YTX, hYTX                                                                                       |             | 250                        | 500                      | 0, 62.5, 125, 250, 500, 750                     |
| SPX1                                                                                            |             | 200                        | 400                      | 0, 50, 100, 200, 400, 600                       |
| GYM                                                                                             |             | 100                        | 200                      | 0, 25, 50, 100, 200, 300                        |
| PnTX G                                                                                          |             | 25                         | 50                       | 0, 6.25, 12.5, 25, 50, 75                       |

<sup>1</sup> Concentrations of the highest isomer present given.

Table S3.10. Validation results of lipophilic phycotoxins in tissue, MMS before samples, recovery and repeatability.

| Compound     | Linearity | % Deviation from the back-calculated concentration |         |         |         |         | Recovery | RSD <sub>r</sub> 0.5 | RSD <sub>r</sub> 1 |
|--------------|-----------|----------------------------------------------------|---------|---------|---------|---------|----------|----------------------|--------------------|
| Requirements | >0.9900   | Level 1                                            | Level 2 | Level 3 | Level 4 | Level 5 | 70-120%  | <20%                 | <20%               |
| OA           | 0.999     | 3.3%                                               | -4.0%   | -7.0%   | 3.1%    | -0.5%   | 120.0%   | 17.1%                | *7.7%              |
| DTX1         | 0.999     | -9.6%                                              | 8.3%    | -4.1%   | -3.8%   | 2.0%    | 109.8%   | 4.6%                 | 8.5%               |
| DTX2         | 0.999     | -20.8%                                             | -3.9%   | 6.2%    | 1.3%    | -1.0%   | 111.4%   | 15.0%                | 12.0%              |
| YTX          | 0.995     | -20.6%                                             | -10.5%  | -14.6%  | 4.5%    | 0.1%    | 90.1%    | *10.7%               | 18.1%              |
| hYTX         | 0.994     | 6.6%                                               | -9.1%   | -21.0%  | -1.2%   | 3.1%    | 75.2%    | *7.1%                | 5.5%               |
| AZA1         | 0.998     | 10.3%                                              | 7.9%    | -2.3%   | -7.2%   | 3.1%    | 95.0%    | 5.1%                 | 3.0%               |
| AZA2         | 0.999     | 12.1%                                              | -1.6%   | -2.7%   | 3.5%    | -1.3%   | 88.7%    | 5.5%                 | 3.4%               |
| AZA3         | 1.000     | 3.7%                                               | 5.8%    | -1.4%   | -0.3%   | 0.1%    | 108.1%   | 6.9%                 | 4.8%               |
| SPX1         | 0.999     | -1.1%                                              | 1.1%    | -0.7%   | 4.5%    | -1.9%   | 109.9%   | 5.0%                 | 7.9%               |
| GYM          | 1.000     | 2.6%                                               | 2.5%    | -0.8%   | -1.5%   | 0.7%    | 102.3%   | 5.6%                 | 6.5%               |
| PnTX G       | 0.999     | -4.2%                                              | -1.3%   | -1.8%   | 3.9%    | -1.5%   | 102.2%   | 7.1%                 | 9.8%               |

\* One outlier, tested with Grubbs test, removed from dataset

**Table S3.11.** Validation results of lipophilic phycotoxins in tissue, MMS after samples.

| Compound            | Linearity         | % Deviation from the back-calculated concentration |                |                |                |                | Drift in sensitivity |
|---------------------|-------------------|----------------------------------------------------|----------------|----------------|----------------|----------------|----------------------|
|                     |                   | Level 1                                            | Level 2        | Level 3        | Level 4        | Level 5        |                      |
| <b>Requirements</b> | <b>&gt;0.9900</b> | <b>&lt;20%</b>                                     | <b>&lt;20%</b> | <b>&lt;20%</b> | <b>&lt;20%</b> | <b>&lt;20%</b> | <b>&lt;30%</b>       |
| OA                  | 0.994             | -1.4%                                              | -13.0%         | 0.1%           | 11.6%          | -4.8%          | -24.2%               |
| DTX1                | 0.997             | -13.3%                                             | 3.3%           | -10.1%         | 8.1%           | -2.5%          | -15.7%               |
| DTX2                | 0.999             | -12.8%                                             | -5.3%          | 4.6%           | 2.6%           | -1.4%          | 6.4%                 |
| YTX                 | 0.993             | -0.8%                                              | -5.8%          | -22.4%         | -1.0%          | 3.1%           | 11.4%                |
| hYTX                | 0.995             | 3.4%                                               | -6.5%          | -15.1%         | -4.9%          | 4.0%           | 3.4%                 |
| AZA1                | 0.995             | -3.0%                                              | -10.2%         | 4.5%           | 10.0%          | -4.6%          | -15.5%               |
| AZA2                | 0.998             | 3.0%                                               | -4.0%          | -1.9%          | 6.9%           | -2.8%          | -4.3%                |
| AZA3                | 0.997             | -9.1%                                              | 4.8%           | 3.9%           | 6.6%           | -3.4%          | -4.3%                |
| SPX1                | 1.000             | -0.2%                                              | 0.0%           | -3.0%          | -0.4%          | 0.5%           | 8.8%                 |
| GYM                 | 0.998             | 15.0%                                              | 3.9%           | -6.7%          | -5.0%          | 2.8%           | 9.1%                 |
| PnTX G              | 0.999             | -6.9%                                              | -1.7%          | 5.9%           | -4.9%          | 1.6%           | 1.4%                 |

**Table S3.12.** Validation results of hydrophilic phycotoxins in tissue, MMS before samples, recovery and repeatability.

| Compound            | Linearity         | % Deviation from the back-calculated concentration |                |                |                | Recovery       | RSD <sub>r</sub> 0.5 | RSD <sub>r</sub> 1 |
|---------------------|-------------------|----------------------------------------------------|----------------|----------------|----------------|----------------|----------------------|--------------------|
|                     |                   | Level 1                                            | Level 2        | Level 3        | Level 4        |                |                      |                    |
| <b>Requirements</b> | <b>&gt;0.9900</b> | <b>&lt;20%</b>                                     | <b>&lt;20%</b> | <b>&lt;20%</b> | <b>&lt;20%</b> | <b>70-120%</b> | <b>&lt;20%</b>       | <b>&lt;20%</b>     |
| DA                  | 0.994             | -25.0%                                             | 9.6%           | 13.3%          | -3.4%          | 93.0%          | 3.4%                 | 1.4%               |
| STX                 | 0.994             | -16.9%                                             | 1.9%           | 8.5%           | -2.4%          | 39.2%          | 59.9%                | 42.7%              |
| dcSTX               | 0.999             | 0.6%                                               | 3.2%           | 2.1%           | -1.8%          | 33.2%          | 53.8%                | 37.4%              |
| NEO                 | 0.966             | -8.9%                                              | -31.3%         | 3.7%           | 7.2%           | 18.4%          | 69.1%                | 43.8%              |
| dcNEO               | 0.992             | -12.4%                                             | -12.0%         | 5.2%           | 2.1%           | 9.2%           | 50.0%                | 35.2%              |
| GTX1&4              | 0.981             | -23.7%                                             | -15.0%         | 3.2%           | 5.0%           | 85.2%          | 8.4%                 | 12.5%              |
| GTX2                | 0.995             | -7.2%                                              | -3.9%          | -5.3%          | 4.1%           | 95.9%          | 7.9%                 | 3.8%               |
| GTX3                | 0.999             | -3.6%                                              | 5.3%           | -0.7%          | -0.6%          | 106.2%         | 8.8%                 | 7.2%               |
| GTX5                | 0.994             | -14.3%                                             | -6.4%          | -0.9%          | 3.6%           | 92.5%          | 5.7%                 | 4.6%               |
| dcGTX2              | 0.994             | -17.1%                                             | -0.4%          | -2.1%          | 2.9%           | 57.3%          | 22.1%                | 12.9%              |
| dcGTX3              | 0.994             | -16.9%                                             | -5.6%          | 2.0%           | 2.4%           | 83.8%          | 13.8%                | 8.5%               |
| C1                  | 0.996             | -9.5%                                              | -7.3%          | 4.1%           | 1.0%           | 81.9%          | 21.5%                | 8.3%               |
| C2                  | 0.979             | -11.2%                                             | -21.9%         | 0.8%           | 6.4%           | 38.3%          | *6.0%                | 30.0%              |

\* One outlier, tested with Grubbs test, removed from dataset

**Table S3.13.** Validation results of hydrophilic phycotoxins in tissue, MMS after samples.

| Compound            | Linearity         | % Deviation from the back-calculated concentration |                |                |                | Drift in sensitivity |
|---------------------|-------------------|----------------------------------------------------|----------------|----------------|----------------|----------------------|
|                     |                   | Level 1                                            | Level 2        | Level 3        | Level 4        |                      |
| <b>Requirements</b> | <b>&gt;0.9900</b> | <b>&lt;20%</b>                                     | <b>&lt;20%</b> | <b>&lt;20%</b> | <b>&lt;20%</b> | <b>&lt;30%</b>       |
| DA                  | 0.993             | -27.1%                                             | 8.9%           | 16.3%          | -3.8%          | -15.2%               |
| STX                 | 0.988             | -11.2%                                             | -16.0%         | 1.3%           | 4.6%           | -17.5%               |
| dcSTX               | 0.997             | -9.3%                                              | -5.0%          | 0.6%           | 2.0%           | -18.1%               |
| NEO                 | 0.968             | -32.3%                                             | -16.6%         | 0.1%           | 7.7%           | -25.3%               |
| dcNEO               | 0.969             | -27.1%                                             | -16.1%         | -4.8%          | 9.2%           | -14.1%               |
| GTX1&4              | 0.980             | -20.1%                                             | -13.9%         | -3.2%          | 7.1%           | -10.4%               |
| GTX2                | 0.994             | -7.6%                                              | -10.6%         | -0.8%          | 3.8%           | -11.5%               |
| GTX3                | 0.996             | -6.6%                                              | -8.7%          | -0.6%          | 3.2%           | -5.9%                |
| GTX5                | 0.995             | -10.3%                                             | -9.3%          | 1.6%           | 2.7%           | -8.5%                |
| dcGTX2              | 0.982             | -26.5%                                             | -2.9%          | -6.7%          | 6.6%           | -4.6%                |
| dcGTX3              | 0.994             | -17.0%                                             | -4.3%          | 0.5%           | 2.8%           | -6.8%                |
| C1                  | 0.996             | -5.8%                                              | 7.1%           | -7.3%          | 2.1%           | -15.8%               |
| C2                  | 0.991             | -23.0%                                             | -2.0%          | -1.0%          | 3.5%           | -16.2%               |

**S4: Standards****Table S4.1.** Hydrophilic standards.

| Chemicals                             | Abbreviation | Concentration or purity         | Supplier                   |
|---------------------------------------|--------------|---------------------------------|----------------------------|
| L-2-Amino-3-methylaminopropionic acid | BMAA         | >97%                            | Sigma-Aldrich <sup>1</sup> |
| Anatoxin                              | ATX          | 4.96 ± 0.18 µg mL <sup>-1</sup> | NRC <sup>2</sup>           |
| Cylindrospermopsin                    | CYN          | 12.6 ± 0.8 µg mL <sup>-1</sup>  | NRC <sup>2</sup>           |
| Decarbamoylgonyautoxin 2&3            | dcGTX2       | 40.9 ± 1.8 µg mL <sup>-1</sup>  | NRC <sup>2</sup>           |
|                                       | dcGTX3       | 9.2 ± 0.3 µg mL <sup>-1</sup>   |                            |
| Decarbamoylsaxitoxin                  | dcSTX        | 16.7 ± 0.5 µg mL <sup>-1</sup>  | NRC <sup>2</sup>           |
| Decarbamoylneosaxitoxin               | dcNEO        | 8.0 ± 0.3 µg mL <sup>-1</sup>   | NRC <sup>2</sup>           |
| L-2,4-Diaminobutyric acid             | DAB          | >95%                            | Sigma-Aldrich <sup>1</sup> |
| Domoic acid                           | DA           | >90%                            | Sigma-Aldrich <sup>1</sup> |
| Gonyautoxin 1&4                       | GTX1         | 24.8 ± 1.3 µg mL <sup>-1</sup>  | NRC <sup>2</sup>           |
|                                       | GTX4         | 8.1 ± 0.7 µg mL <sup>-1</sup>   |                            |
| Gonyautoxin 2&3                       | GTX2         | 45.2 ± 2.3 µg mL <sup>-1</sup>  | NRC <sup>2</sup>           |
|                                       | GTX3         | 17.2 ± 0.9 µg mL <sup>-1</sup>  |                            |
| Gonyautoxin 5                         | GTX5         | 24.7 ± 1.1 µg mL <sup>-1</sup>  | NRC <sup>2</sup>           |
| Neosaxitoxin                          | NEO          | 20.7 ± 1.1 µg mL <sup>-1</sup>  | NRC <sup>2</sup>           |
| Saxitoxin                             | STX          | 19.8 ± 0.4 µg mL <sup>-1</sup>  | NRC <sup>2</sup>           |
| N-Sulfocarbamoylgonyautoxin-2&3       | C1           | 53.9 ± 1.8 µg mL <sup>-1</sup>  | NRC <sup>2</sup>           |
|                                       | C2           | 16.1 ± 1.3 µg mL <sup>-1</sup>  |                            |
| Tetrodotoxin                          | TTX          | 96%                             | Latoxan <sup>3</sup>       |
| Tetrodotoxin & 4,9-anhydro TTX        | TTX          | 25.6 ± 1.8 µg mL <sup>-1</sup>  | CIFGA <sup>4</sup>         |
|                                       | anhTTX       | 3.0 ± 0.2 µg mL <sup>-1</sup>   |                            |

<sup>1</sup> Sigma-Aldrich, Zwijndrecht, The Netherlands

<sup>2</sup> National Research Council, Measurement science and standards, Halifax, Canada

<sup>3</sup> Latoxan, Valence, France

<sup>4</sup> CIFGA, Lugo, Spain

**Table S4.2.** lipophilic standards.

| Chemicals                               | Abbreviation                  | Concentration or purity          | Supplier                              |
|-----------------------------------------|-------------------------------|----------------------------------|---------------------------------------|
| Azaspiracid-1                           | AZA1                          | 1.24 ± 0.07 µg mL <sup>-1</sup>  | NRC <sup>1</sup>                      |
| Azaspiracid-2                           | AZA2                          | 1.28 ± 0.05 µg mL <sup>-1</sup>  | NRC <sup>1</sup>                      |
| Azaspiracid-3                           | AZA3                          | 1.04 ± 0.04 µg mL <sup>-1</sup>  | NRC <sup>1</sup>                      |
| Azaspiracid-4                           | AZA4                          | 1.19 ± 0.07 µg mL <sup>-1</sup>  | CIFGA <sup>2</sup>                    |
| Azaspiracid-5                           | AZA5                          | 1.20 ± 0.07 µg mL <sup>-1</sup>  | CIFGA <sup>2</sup>                    |
| Brevetoxin 2                            | PbTx 2                        | 95%                              | Latoxan <sup>3</sup>                  |
| Brevetoxin 3                            | PbTx 3                        | 95%                              | Latoxan <sup>3</sup>                  |
| Brevetoxin 9                            | PbTx 9                        | 95%                              | Latoxan <sup>3</sup>                  |
| 13-Desmethyl spirolide C                | SPX1                          | 7.0 ± 0.4 µg mL <sup>-1</sup>    | NRC <sup>1</sup>                      |
| 13,19-Didesmethyl spirolide C           | 13,19-didesMeSPXC             | 10.24 ± 0.98 µg mL <sup>-1</sup> | CIFGA <sup>2</sup>                    |
| Dinophysistoxin-1                       | DTX1                          | 15.1 ± 1.1 µg mL <sup>-1</sup>   | NRC <sup>1</sup>                      |
| Dinophysistoxin-2                       | DTX2                          | 7.8 ± 0.4 µg mL <sup>-1</sup>    | NRC <sup>1</sup>                      |
| Gymnodimine                             | GYM                           | 5.0 ± 0.2 µg mL <sup>-1</sup>    | NRC <sup>1</sup>                      |
| Homoyessotoxin                          | hYTX                          | 5.8 ± 0.3 µg mL <sup>-1</sup>    | NRC <sup>1</sup>                      |
| 20-Methyl spirolide G                   | 20MeSPXG                      | 7.01 ± 0.61 µg mL <sup>-1</sup>  | CIFGA <sup>2</sup>                    |
| Microcystin-HilR                        | MC-HilR                       | >95%                             | Enzo Life Sciences <sup>4</sup>       |
| Microcystin-HtyR                        | MC-HtyR                       | >95%                             | Enzo Life Sciences <sup>4</sup>       |
| Microcystin-LA                          | MC-LA                         | >95%                             | Enzo Life Sciences <sup>4</sup>       |
| Microcystin-LF                          | MC-LF                         | >95%                             | Enzo Life Sciences <sup>4</sup>       |
| Microcystin-LR                          | MC-LR                         | >95%                             | Enzo Life Sciences <sup>4</sup>       |
| [D-Asp <sup>3</sup> ]Microcystin-LR     | Asp MC-LR                     | >95%                             | Enzo Life Sciences <sup>4</sup>       |
| Microcystin-LW                          | MC-LW                         | >95%                             | Enzo Life Sciences <sup>4</sup>       |
| Microcystin-LY                          | MC-LY                         | >95%                             | Enzo Life Sciences <sup>4</sup>       |
| Microcystin-RR                          | MC-RR                         | >95%                             | Enzo Life Sciences <sup>4</sup>       |
| Microcystin-YR                          | MC-YR                         | >95%                             | Enzo Life Sciences <sup>4</sup>       |
| Nodularin                               | NOD                           | >95%                             | Enzo Life Sciences <sup>4</sup>       |
| Okadaic acid                            | OA                            | 13.7 ± 0.6 µg mL <sup>-1</sup>   | NRC <sup>1</sup>                      |
| Okadaic acid C <sub>8</sub> -diol ester | OA C <sub>8</sub> -diol ester | >90%                             | Enzo Life Sciences <sup>4</sup>       |
| Okadaic acid methyl ester               | OA methyl ester               | >90%                             | Enzo Life Sciences <sup>4</sup>       |
| Pacific ciguatoxin 1                    | pCTX1                         | No certified concentration       | University of Queensland <sup>5</sup> |
| Pacific ciguatoxin 2                    | pCTX2                         | No certified concentration       | University of Queensland <sup>5</sup> |
| Pacific ciguataxin 3                    | pCTX3                         | No certified concentration       | University of Queensland <sup>5</sup> |
| 7-O-Palmitoyl okadaic acid              | 16:0 OA ester, DTX3           | 90-94%                           | MP Biomedicals <sup>6</sup>           |
| Palytoxin                               | PITX                          | >90%                             | Wako <sup>7</sup>                     |
| Pectenotoxin-2                          | PTX2                          | 8.6 ± 0.3 µg mL <sup>-1</sup>    | NRC <sup>1</sup>                      |
| Pinnatoxin E                            | PnTX E                        | No certified concentration       | Cawthron Institute <sup>8</sup>       |
| Pinnatoxin F                            | PnTX F                        | No certified concentration       | Cawthron Institute <sup>8</sup>       |
| Pinnatoxin G                            | PnTX G                        | No certified concentration       | Cawthron Institute <sup>8</sup>       |
| Yessotoxin                              | YTX                           | 5.6 ± 0.2 µg mL <sup>-1</sup>    | NRC <sup>1</sup>                      |

<sup>1</sup> National Research Council, Measurement science and standards, Halifax, Canada

<sup>2</sup> CIFGA, Lugo, Spain

<sup>3</sup> Latoxan, Valence, France

<sup>4</sup> Enzo Life Sciences, Antwerp, Belgium

<sup>5</sup> Professor Lewis, Institute for molecular Bioscience, The University of Queensland, Australia

<sup>6</sup> MP Biomedicals, Santa Ana, United states

<sup>7</sup> Wako, Osaka, Japan

<sup>8</sup> Cawthron Institute, Nelson, New Zealand
